# Supplementary material for: Deep profiling reveals coordinated remodeling of ganglioside metabolism in MCF-7 breast cancer cell line
Source: Royal Society of Chemistry journal article supplement (doi:10.1039/d5sc09445c), 2026-01-01
Supplement: d5sc09445c2.xlsx [file d5sc09445c2.xlsx]

## Sheet: MCF-7 species
Table S1. List of 319 ganglioside species identified in MCF-7 cells
Number of Subclasses	Subclasses	R.T. (min)	Number of Species	Species	Molecular Ion	Theoretical Mass (m/z)	Measured Mass (m/z)	Mass Accuracy (ppm)	1/K0 (V·S/cm2)	#1 Int.	#2 Int.	#3 Int.	#1 %Rel Abundances	#2 %Rel Abundances	#3 %Rel Abundances	Average	SD	RSD
1	GM3	4.65	1	GM3 32:1;O2	[M-H]-	1123.67	1123.67	-3.38176	1.663	12591	20486	10012	0.00357065	0.00314507	0.00309488	0.0032702	0.000261401	0.0799341
			2	GM3 33:1;O2	[M-H]-	1137.69	1137.69	-4.17513	1.681	5362	8698	4653	0.00152059	0.00133534	0.00143832	0.00143142	9.28183e-05	0.0648435
			3	GM3 34:1;O2	[M-H]-	1151.71	1151.7	-3.55994	1.694	297392	552185	280883	0.0843366	0.0847731	0.0868258	0.0853118	0.00132921	0.0155806
			4	GM3 35:1;O2	[M-H]-	1165.72	1165.72	-2.44484	1.711	10210	15129	8914	0.00289543	0.00232265	0.00275547	0.00265785	0.000298606	0.112349
			5	GM3 36:1;O2	[M-H]-	1179.74	1179.73	-3.13629	1.727	58961	114574	53562	0.0167206	0.0175897	0.016557	0.0169558	0.000555112	0.0327388
			6	GM3 37:1;O2	[M-H]-	1193.75	1193.75	-4.73297	1.739	6512	6912	6314	0.00184672	0.00106115	0.00195177	0.00161988	0.000486715	0.300464
			7	GM3 38:1;O2	[M-H]-	1207.77	1207.76	-3.89147	1.756	44261	50373	41826	0.0125519	0.00773342	0.0129291	0.0110715	0.00289699	0.261663
			8	GM3 39:1;O2	[M-H]-	1221.78	1221.78	-2.08711	1.771	8951	7701	8219	0.00253839	0.00118228	0.00254064	0.0020871	0.000783599	0.375448
			9	GM3 40:1;O2	[M-H]-	1235.8	1235.79	-4.45056	1.788	136541	231466	114980	0.0387213	0.0355354	0.0355423	0.0365997	0.00183738	0.0502022
			10	GM3 41:1;O2	[M-H]-	1249.82	1249.81	-4.60068	1.801	42561	64682	37938	0.0120698	0.00993018	0.0117273	0.0112424	0.00114925	0.102225
			11	GM3 42:1;O2	[M-H]-	1263.83	1263.82	-5.22222	1.815	230804	427208	208360	0.0654531	0.0655863	0.0644077	0.065149	0.000645431	0.00990699
			12	GM3 43:1;O2	[M-H]-	1277.85	1277.84	-5.28232	1.827	37965	49186	34907	0.0107664	0.00755118	0.0107904	0.00970265	0.00186326	0.192036
			13	GM3 44:1;O2	[M-H]-	1291.86	1291.86	-4.79927	1.839	86514	196669	76196	0.0245343	0.0301932	0.0235535	0.0260937	0.00358403	0.137352
			14	GM3 45:1;O2	[M-H]-	1305.88	1305.87	-6.77705	1.85	8312	10643	7728	0.00235718	0.00163395	0.00238886	0.00212666	0.000426998	0.200783
			15	GM3 46:1;O2	[M-H]-	1319.89	1319.88	-8.334	1.859	4561	5504	3240	0.00129344	0.000844991	0.00100154	0.00104666	0.000227604	0.217458
			16	GM3 34:2;O2	[M-H]-	1149.69	1149.69	-2.56591	1.688	13641	17035	9561	0.00386841	0.00261527	0.00295547	0.00314638	0.00064802	0.205957
			17	GM3 36:2;O2	[M-H]-	1177.72	1177.72	-2.50484	1.724	14561	16027	19027	0.00412931	0.00246051	0.00588158	0.00415714	0.0017107	0.41151
			18	GM3 38:2;O2	[M-H]-	1205.75	1205.75	-0.870825	1.75	12561	73741	10292	0.00356214	0.0113209	0.00318144	0.00602151	0.00459339	0.762831
			19	GM3 40:2;O2	[M-H]-	1233.78	1233.78	-2.55312	1.774	45612	82418	40767	0.012935	0.0126531	0.0126018	0.0127299	0.000179407	0.0140933
			20	GM3 41:2;O2	[M-H]-	1247.8	1247.79	-6.97227	1.79	26514	42229	23094	0.00751903	0.00648312	0.00713876	0.00704697	0.000524018	0.0743607
			21	GM3 42:2;O2	[M-H]-	1261.82	1261.81	-4.55693	1.801	245614	546683	212719	0.069653	0.0839284	0.0657552	0.0731122	0.00956774	0.130864
			22	GM3 43:2;O2	[M-H]-	1275.83	1275.83	-4.46768	1.817	26591	54972	25745	0.00754087	0.00843947	0.00795823	0.00797952	0.000449679	0.0563541
			23	GM3 44:2;O2	[M-H]-	1289.85	1289.84	-4.07025	1.831	126524	244451	116441	0.0358806	0.0375289	0.0359939	0.0364678	0.000920653	0.0252456
			24	GM3 45:2;O2	[M-H]-	1303.86	1303.86	-1.99408	1.845	9961	15787	7851	0.00282481	0.00242367	0.00242688	0.00255845	0.000230679	0.0901633
			25	GM3 46:2;O2	[M-H]-	1317.88	1317.87	-3.45252	1.855	3651	11291	3252	0.00103538	0.00173343	0.00100525	0.00125802	0.000411993	0.327493
			26	GM3 40:3;O2	[M-H]-	1231.77	1231.76	-4.87105	1.769	8794	5277	7791	0.00249387	0.000810141	0.00240833	0.00190411	0.000948373	0.498065
			27	GM3 41:3;O2	[M-H]-	1245.78	1245.78	-2.0469	1.786	5641	3494	3747	0.00159972	0.00053641	0.00115826	0.00109813	0.000534197	0.486461
			28	GM3 42:3;O2	[M-H]-	1259.8	1259.79	-5.63582	1.795	30214	73586	25664	0.0085683	0.0112971	0.00793319	0.00926621	0.00178728	0.192881
			29	GM3 43:3;O2	[M-H]-	1273.82	1273.81	-4.43549	1.81	4895	6862	4524	0.00138816	0.00105348	0.00139845	0.00128003	0.000196267	0.153331
			30	GM3 44:3;O2	[M-H]-	1287.83	1287.83	-4.11545	1.824	11561	19390	10231	0.00327855	0.00297681	0.00316258	0.00313931	0.00015221	0.0484849
			31	GM3 42:4;O2	[M-H]-	1257.78	1257.78	-3.77648	1.788	16474	11595	14568	0.00467182	0.0017801	0.00450322	0.00365171	0.00162306	0.444464
			32	GM3 43:4;O2	[M-H]-	1271.8	1271.81	4.16732	1.8	4021	2738	2631	0.0011403	0.000420346	0.000813288	0.000791313	0.000360482	0.455549
			33	GM3 44:4;O2	[M-H]-	1285.82	1285.81	-5.56067	1.818	4561	6360	2613	0.00129344	0.000976407	0.000807724	0.00102586	0.000246606	0.24039
			34	GM3 32:0;O3	[M-H]-	1141.69	1141.68	-3.38097	1.648	11241	22070	8745	0.0031878	0.00338825	0.00270323	0.0030931	0.000352194	0.113865
			35	GM3 33:0;O3	[M-H]-	1155.7	1155.7	-3.2967	1.661	4651	4385	3018	0.00131896	0.000673199	0.000932917	0.000975026	0.000324936	0.333258
			36	GM3 34:0;O3	[M-H]-	1169.72	1169.71	-1.50464	1.676	135614	222235	108522	0.0384584	0.0341182	0.033546	0.0353742	0.00268626	0.0759383
			37	GM3 35:0;O3	[M-H]-	1183.73	1183.73	-5.07716	1.691	6651	11249	6214	0.00188614	0.00172698	0.00192086	0.00184466	0.00010338	0.0560427
			38	GM3 36:0;O3	[M-H]-	1197.75	1197.74	-3.64017	1.708	30214	48150	26514	0.0085683	0.00739213	0.00819594	0.00805213	0.000601129	0.0746546
			39	GM3 38:0;O3	[M-H]-	1225.78	1225.77	-4.12799	1.731	40215	69279	36151	0.0114045	0.0106359	0.0111749	0.0110718	0.000394514	0.0356324
			40	GM3 39:0;O3	[M-H]-	1239.79	1239.79	-2.18585	1.744	5798	8449	5351	0.00164424	0.00129712	0.00165409	0.00153181	0.000203314	0.132728
			41	GM3 40:0;O3	[M-H]-	1253.81	1253.81	-3.87618	1.758	119451	272005	103253	0.0338748	0.041759	0.0319173	0.0358504	0.00520981	0.145321
			42	GM3 41:0;O3	[M-H]-	1267.83	1267.82	-5.76578	1.77	48951	84481	44781	0.0138819	0.0129698	0.0138426	0.0135647	0.000515633	0.0380127
			43	GM3 42:0;O3	[M-H]-	1281.84	1281.83	-5.89776	1.786	261541	496336	238900	0.0741697	0.076199	0.0738482	0.074739	0.00127463	0.0170544
			44	GM3 43:0;O3	[M-H]-	1295.86	1295.85	-7.41594	1.8	24516	46061	26056	0.00695242	0.00707143	0.00805437	0.0073594	0.000604787	0.0821788
			45	GM3 44:0;O3	[M-H]-	1309.87	1309.87	-0.419888	1.812	90014	197605	82918	0.0255268	0.0303369	0.0256314	0.027165	0.00274742	0.101138
			46	GM3 34:1;O3	[M-H]-	1167.7	1167.7	-3.60538	1.672	56541	99851	49260	0.0160343	0.0153294	0.0152271	0.0155303	0.000439479	0.0282982
			47	GM3 36:1;O3	[M-H]-	1195.73	1195.73	-5.44436	1.707	8951	12446	7056	0.00253839	0.00191075	0.00218113	0.00221009	0.000314821	0.142447
			48	GM3 38:1;O3	[M-H]-	1223.76	1223.76	-5.07451	1.735	13561	19217	10891	0.00384573	0.00295025	0.0033666	0.00338753	0.000448104	0.132281
			49	GM3 40:1;O3	[M-H]-	1251.79	1251.79	-3.2034	1.752	50216	88449	46511	0.0142406	0.013579	0.0143774	0.0140656	0.000426993	0.0303571
			50	GM3 41:1;O3	[M-H]-	1265.81	1265.8	-5.34045	1.766	45216	76719	45871	0.0128227	0.0117781	0.0141795	0.0129268	0.00120408	0.0931459
			51	GM3 42:1;O3	[M-H]-	1279.83	1279.82	-4.85222	1.779	356214	639646	291874	0.101018	0.0982004	0.0902234	0.0964805	0.00559895	0.0580319
			52	GM3 43:1;O3	[M-H]-	1293.84	1293.83	-5.37933	1.796	30561	54286	28914	0.00866671	0.00833415	0.00893782	0.00864623	0.000302356	0.0349697
			53	GM3 44:1;O3	[M-H]-	1307.86	1307.85	-4.8935	1.809	16541	282091	135112	0.00469082	0.0433075	0.0417655	0.0299213	0.0218638	0.730711
			54	GM3 34:2;O3	[M-H]-	1165.69	1165.68	-5.37023	1.662	8654	9651	6957	0.00245416	0.00148165	0.00215053	0.00202878	0.000497556	0.245249
			55	GM3 36:2;O3	[M-H]-	1193.72	1193.71	-1.30684	1.7	4561	5242	3210	0.00129344	0.000804768	0.000992267	0.00103016	0.00024653	0.239313
			56	GM3 40:2;O3	[M-H]-	1249.78	1249.78	-1.80832	1.751	8951	16250	8651	0.00253839	0.00249475	0.00267418	0.0025691	9.35734e-05	0.0364226
			57	GM3 41:2;O3	[M-H]-	1263.79	1263.79	-4.1225	1.765	14561	10699	11843	0.00412931	0.00164254	0.00366088	0.00314424	0.00132143	0.420271
			58	GM3 42:2;O3	[M-H]-	1277.81	1277.8	-4.74249	1.775	146581	192457	128918	0.0415685	0.0295466	0.0398508	0.0369886	0.00650197	0.175783
			59	GM3 43:2;O3	[M-H]-	1291.83	1291.82	-4.57492	1.796	16541	20540	11251	0.00469082	0.00315336	0.00347788	0.00377402	0.000810379	0.214726
			60	GM3 44:2;O3	[M-H]-	1305.84	1305.84	-3.79066	1.807	85614	110006	75920	0.024279	0.0168885	0.0234682	0.0215452	0.00405321	0.188126
			61	GM3 42:3;O3	[M-H]-	1275.79	1275.79	-2.67284	1.769	48954	29930	41433	0.0138827	0.00459494	0.0128077	0.0104284	0.00508048	0.487175
			62	GM3 44:3;O3	[M-H]-	1303.83	1303.82	-3.60478	1.802	13561	20474	11470	0.00384573	0.00314323	0.00354558	0.00351151	0.000352484	0.10038
			63	GM3 34:0;O4	[M-H]-	1185.71	1185.7	-5.62532	1.673	13561	14532	10708	0.00384573	0.002231	0.00331003	0.00312892	0.000822459	0.262857
			64	GM3 36:0;O4	[M-H]-	1213.74	1213.74	-4.42433	1.701	3456	6294	3177	0.000980077	0.000966274	0.000982066	0.000976139	8.60118e-06	0.00881142
			65	GM3 38:0;O4	[M-H]-	1241.77	1241.77	-4.80764	1.729	3465	4553	3021	0.00098263	0.00069899	0.000933844	0.000871821	0.000151651	0.173947
			66	GM3 40:0;O4	[M-H]-	1269.81	1269.8	-5.17402	1.754	6541	10826	5642	0.00185494	0.00166204	0.00174404	0.00175368	9.6812e-05	0.0552052
			67	GM3 42:0;O4	[M-H]-	1297.84	1297.83	-4.90817	1.777	53654	90868	48945	0.0152156	0.0139503	0.0151298	0.0147652	0.000707022	0.0478843
			68	GM3 44:0;O4	[M-H]-	1325.87	1325.86	-2.31546	1.804	25647	43125	22561	0.00727316	0.00662068	0.006974	0.00695595	0.000326614	0.0469547
			69	GM3 40:1;O4	[M-H]-	1267.79	1267.78	-4.74842	1.747	5641	4350	3210	0.00159972	0.000667825	0.000992267	0.0010866	0.000473053	0.435351
			70	GM3 42:1;O4	[M-H]-	1295.82	1295.82	-3.56531	1.772	21014	32137	17954	0.0059593	0.00493377	0.0055499	0.00548099	0.000516227	0.0941849
			71	GM3 44:1;O4	[M-H]-	1323.85	1323.85	-4.62287	1.801	51326	87743	46581	0.0145554	0.0134706	0.014399	0.0141417	0.000586414	0.0414671
			72	GM3 42:2;O4	[M-H]-	1293.81	1293.8	-4.30513	1.766	19854	31784	17841	0.00563034	0.00487958	0.00551496	0.00534163	0.000404285	0.0756857
			73	GM3 44:2;O4	[M-H]-	1321.84	1321.83	-4.13818	1.795	14568	21857	11561	0.0041313	0.00335555	0.00357371	0.00368685	0.000400058	0.108509
										3526252	6513680	3235016	1	1	1
2	GM3(NeuGc）	5.35	74	GM3(NeuGc) 34:1;O2	[M-H]-	1167.7	1167.7	-3.26282	1.707	28951	34465	25583	0.298258	0.295477	0.307038	0.300257	0.00603431	0.0200971
			75	GM3(NeuGc) 36:1;O2	[M-H]-	1195.73	1195.73	-4.69169	1.739	7461	5756	6184	0.0768644	0.0493476	0.0742181	0.06681	0.0151807	0.227222
			76	GM3(NeuGc) 40:1;O2	[M-H]-	1251.79	1251.79	-5.75973	1.801	7651	4304	5869	0.0788218	0.0368992	0.0704376	0.0620529	0.0221834	0.357492
			77	GM3(NeuGc) 42:2;O2	[M-H]-	1277.81	1277.81	0.579116	1.814	14561	23865	11406	0.15001	0.2046	0.136891	0.163834	0.0359093	0.219181
			78	GM3(NeuGc) 44:2;O2	[M-H]-	1305.84	1305.85	6.70066	1.846	3456	4213	3087	0.0356043	0.0361191	0.037049	0.0362575	0.000732258	0.0201961
			79	GM3(NeuGc) 34:0;O3	[M-H]-	1185.71	1185.71	-0.480724	1.688	9861	13330	9199	0.10159	0.114281	0.110403	0.108758	0.00650379	0.0598006
			80	GM3(NeuGc) 36:0;O3	[M-H]-	1213.74	1213.74	-4.09477	1.703	3564	7447	3154	0.0367169	0.0638449	0.0378531	0.0461383	0.0153449	0.332584
			81	GM3(NeuGc) 34:1;O3	[M-H]-	1183.73	1183.73	-2.28937	1.691	6541	5930	5321	0.0673864	0.0508393	0.0638607	0.0606955	0.00871583	0.143599
			82	GM3(NeuGc) 42:1;O3	[M-H]-	1295.82	1295.82	-1.55886	1.795	7984	9705	7063	0.0822525	0.0832033	0.0847675	0.0834078	0.00126994	0.0152256
			83	GM3(NeuGc) 42:2;O3	[M-H]-	1293.81	1293.8	-1.67722	1.793	4681	3759	4326	0.0482244	0.0322268	0.0519191	0.0441234	0.0104671	0.237223
			84	GM3(NeuGc) 44:1;O3	[M-H]-	1323.85	1323.85	-4.62287	1.819	2356	3868	2130	0.0242719	0.0331613	0.0255635	0.0276656	0.00480306	0.173612
										97067	116642	83322	1	1	1
3	GM2	5.412	85	GM2 32:1;O2	[M-H]-	1326.75	1326.75	-1.73355	1.823	9184	9476	8170	0.00522307	0.00340615	0.00563836	0.00475586	0.00118719	0.249626
			86	GM2 33:1;O2	[M-H]-	1340.77	1340.77	-1.67814	1.834	5621	3821	4450	0.00319674	0.00137346	0.00307108	0.00254709	0.00101834	0.399804
			87	GM2 34:1;O2	[M-H]-	1354.79	1354.78	-2.73106	1.848	156488	160847	137855	0.088997	0.0578164	0.0951378	0.0806504	0.0200118	0.24813
			88	GM2 35:1;O2	[M-H]-	1368.8	1368.8	-1.936	1.862	8145	5270	6246	0.00463218	0.0018943	0.00431055	0.00361234	0.00149653	0.414283
			89	GM2 36:1;O2	[M-H]-	1382.82	1382.81	-4.33897	1.874	25663	21492	19281	0.0145949	0.00772529	0.0133064	0.0118755	0.0036515	0.307481
			90	GM2 38:1;O2	[M-H]-	1410.85	1410.84	-3.82749	1.902	23561	19617	18366	0.0133995	0.00705133	0.0126749	0.0110419	0.00347488	0.314699
			91	GM2 39:1;O2	[M-H]-	1424.86	1424.86	-3.89511	1.917	3210	4037	2486	0.00182557	0.0014511	0.00171566	0.00166411	0.000192486	0.115669
			92	GM2 40:1;O2	[M-H]-	1438.88	1438.88	-2.91894	1.93	66541	58573	55172	0.0378428	0.0210541	0.0380758	0.0323242	0.00976096	0.30197
			93	GM2 41:1;O2	[M-H]-	1452.89	1452.89	-4.09527	1.943	23514	24758	18284	0.0133727	0.00889926	0.0126183	0.0116301	0.00239488	0.205921
			94	GM2 42:1;O2	[M-H]-	1466.91	1466.9	-5.72632	1.956	145861	322569	130380	0.0829532	0.115947	0.0899791	0.0962932	0.0173797	0.180487
			95	GM2 43:1;O2	[M-H]-	1480.93	1480.92	-6.17857	1.967	23156	41971	18671	0.0131691	0.0150865	0.0128854	0.0137137	0.00119731	0.0873074
			96	GM2 44:1;O2	[M-H]-	1494.94	1494.93	-6.08719	1.98	91584	172055	78514	0.0520851	0.0618451	0.0541848	0.0560384	0.00513722	0.0916733
			97	GM2 45:1;O2	[M-H]-	1508.96	1508.94	-9.17852	1.992	5231	7992	4213	0.00297494	0.00287272	0.00290752	0.00291839	5.19721e-05	0.0178085
			98	GM2 46:1;O2	[M-H]-	1522.97	1522.96	-6.63177	2.004	5361	7891	4316	0.00304888	0.00283642	0.0029786	0.00295463	0.000108239	0.0366336
			99	GM2 34:2;O2	[M-H]-	1352.77	1352.77	-2.99386	1.841	13465	9870	10905	0.00765774	0.00354777	0.00752586	0.00624379	0.00233575	0.374092
			100	GM2 36:2;O2	[M-H]-	1380.8	1380.8	-2.06402	1.871	10412	4601	8002	0.00592145	0.00165383	0.00552242	0.0043659	0.00235718	0.539907
			101	GM2 38:2;O2	[M-H]-	1408.83	1408.83	-1.73903	1.897	7145	5013	6125	0.00406346	0.00180192	0.00422704	0.00336414	0.00135539	0.402894
			102	GM2 40:2;O2	[M-H]-	1436.86	1436.86	-2.95783	1.921	24678	19566	20861	0.0140347	0.00703299	0.0143968	0.0118215	0.00415092	0.351133
			103	GM2 41:2;O2	[M-H]-	1450.88	1450.88	-2.82587	1.931	13162	12429	9882	0.00748542	0.0044676	0.00681986	0.00625763	0.00158552	0.253375
			104	GM2 42:2;O2	[M-H]-	1464.89	1464.89	-3.99346	1.945	135241	274645	101436	0.0769135	0.0987211	0.070004	0.0818795	0.0149888	0.183059
			105	GM2 43:2;O2	[M-H]-	1478.91	1478.9	-5.20654	1.956	17895	35043	14200	0.0101771	0.0125962	0.00979984	0.0108577	0.00151733	0.139747
			106	GM2 44:2;O2	[M-H]-	1492.93	1492.92	-4.38736	1.968	96541	178973	80413	0.0549043	0.0643318	0.0554954	0.0582438	0.00528063	0.0906642
			107	GM2 45:2;O2	[M-H]-	1506.94	1506.94	-3.51706	1.982	13561	10924	8951	0.00771234	0.00392663	0.00617735	0.00593877	0.0019041	0.320621
			108	GM2 46:2;O2	[M-H]-	1520.96	1520.95	-4.04351	1.995	10002	10661	8651	0.00568828	0.00383209	0.00597031	0.00516356	0.00116168	0.224976
			109	GM2 40:3;O2	[M-H]-	1434.85	1434.85	1.18479	1.919	6541	3355	4181	0.00371996	0.00120595	0.00288543	0.00260378	0.00128045	0.491765
			110	GM2 42:3;O2	[M-H]-	1462.88	1462.88	-2.73433	1.938	27895	27464	22922	0.0158643	0.00987193	0.0158192	0.0138518	0.00344673	0.24883
			111	GM2 43:3;O2	[M-H]-	1476.89	1476.88	-7.82046	1.951	4651	4342	2790	0.00264509	0.00156073	0.00192546	0.00204376	0.000551774	0.26998
			112	GM2 44:3;O2	[M-H]-	1490.91	1490.9	-3.80305	1.962	18956	30119	14766	0.0107805	0.0108263	0.0101905	0.0105991	0.000354626	0.0334582
			113	GM2 42:4;O2	[M-H]-	1460.86	1460.86	-3.31995	1.928	14561	49044	11160	0.00828105	0.0176289	0.00770185	0.0112039	0.00557169	0.497298
			114	GM2 44:4;O2	[M-H]-	1488.89	1488.9	1.57835	1.951	16541	4681	12459	0.0094071	0.00168258	0.00859833	0.00656267	0.00424558	0.646929
			115	GM2 32:0;O3	[M-H]-	1344.76	1344.76	-3.46529	1.768	3456	7343	2830	0.00196548	0.00263944	0.00195307	0.00218599	0.000392744	0.179664
			116	GM2 34:0;O3	[M-H]-	1372.8	1372.79	-4.05013	1.792	49874	82710	42375	0.0283641	0.0297301	0.0292442	0.0291128	0.000692437	0.0237846
			117	GM2 36:0;O3	[M-H]-	1400.83	1400.82	-5.18265	1.824	7689	17227	6681	0.00437284	0.00619224	0.00461076	0.00505861	0.00098893	0.195494
			118	GM2 38:0;O3	[M-H]-	1428.86	1428.85	-3.33133	1.859	14581	20380	11629	0.00829242	0.00732559	0.00802552	0.00788118	0.000499319	0.0633559
			119	GM2 40:0;O3	[M-H]-	1456.89	1456.88	-4.64002	1.885	39541	77625	32772	0.0224875	0.0279023	0.0226169	0.0243356	0.00308953	0.126955
			120	GM2 41:0;O3	[M-H]-	1470.91	1470.9	-3.27009	1.9	13854	26248	10490	0.00787897	0.00943484	0.00723946	0.00818442	0.00112911	0.137959
			121	GM2 42:0;O3	[M-H]-	1484.92	1484.91	-4.55243	1.909	69845	199314	60158	0.0397219	0.0716434	0.0415168	0.0509607	0.0179342	0.351922
			122	GM2 43:0;O3	[M-H]-	1498.94	1498.93	-3.94279	1.918	13851	31951	10463	0.00787726	0.0114848	0.00722083	0.00886096	0.00229588	0.259101
			123	GM2 44:0;O3	[M-H]-	1512.95	1512.95	-4.13761	1.928	57894	92911	48755	0.0329251	0.0333968	0.0336473	0.0333231	0.000366668	0.0110034
			124	GM2 40:1;O3(t18:0)	[M-H]-	1454.87	1454.87	-2.68752	1.87	25612	21245	17638	0.0145659	0.00763651	0.0121725	0.0114583	0.00351948	0.307155
			125	GM2 41:1;O3(t18:0)	[M-H]-	1468.89	1468.88	-3.98941	1.877	8951	17855	7923	0.00509056	0.00641798	0.0054679	0.00565881	0.00068399	0.120872
			126	GM2 42:1;O3(t18:0)	[M-H]-	1482.91	1482.9	-3.91798	1.891	85413	199314	77072	0.0485756	0.0716434	0.0531897	0.0578029	0.0122062	0.21117
			127	GM2 43:1;O3(t18:0)	[M-H]-	1496.92	1496.91	-4.24872	1.903	15421	18341	11924	0.00877014	0.00659267	0.00822911	0.00786397	0.00113373	0.144168
			128	GM2 44:1;O3(t18:0)	[M-H]-	1510.94	1510.93	-3.58056	1.913	63512	133589	54838	0.0361202	0.0480185	0.0378453	0.0406614	0.00642963	0.158126
			129	GM2 42:2;O3(t18:0)	[M-H]-	1480.89	1480.88	-5.17257	1.878	16574	41413	13443	0.00942587	0.0148859	0.00927741	0.0111964	0.00319606	0.285455
			130	GM2 44:2;O3(t18:0)	[M-H]-	1508.92	1508.91	-4.01611	1.9	26851	34458	19640	0.0152705	0.0123859	0.0135541	0.0137369	0.00145097	0.105626
			131	GM2 42:3;O3(t18:0)	[M-H]-	1478.87	1478.87	-3.25247	1.876	9851	8289	7398	0.0056024	0.00297948	0.00510558	0.00456249	0.00139325	0.305371
			132	GM2 44:3;O3(t18:0)	[M-H]-	1506.91	1506.9	-6.31095	1.896	10266	10311	8169	0.00583842	0.00370629	0.00563767	0.00506079	0.00117732	0.232636
			133	GM2 34:1;O3(d18:1)	[M-H]-	1370.78	1370.78	-2.63354	1.829	14562	13828	12235	0.00828162	0.00497047	0.00844374	0.00723194	0.00196017	0.271043
			134	GM2 42:1;O3(d18:1)	[M-H]-	1482.91	1482.9	-6.48052	1.937	36541	40397	28948	0.0207814	0.0145207	0.0199779	0.0184267	0.00340644	0.184865
			135	GM2 42:2;O3(d18:1)	[M-H]-	1480.89	1480.88	-3.61945	1.931	39854	33424	32787	0.0226655	0.0120142	0.0226273	0.0191024	0.00613851	0.321348
			136	GM2 44:2;O3(d18:1)	[M-H]-	1508.92	1508.92	-3.55221	1.931	39875	40991	32681	0.0226775	0.0147342	0.0225541	0.0199886	0.00455086	0.227673
			137	GM2 42:3;O3(d18:1)	[M-H]-	1478.87	1478.87	-0.750571	1.925	13465	5693	11051	0.00765774	0.00204635	0.00762662	0.0057769	0.00323079	0.55926
			138	GM2 44:3;O3(d18:1)	[M-H]-	1506.91	1506.91	3.04598	1.947	13561	8951	10206	0.00771234	0.00321743	0.00704346	0.00599108	0.00242522	0.404805
			139	GM2 42:1;O4	[M-H]-	1498.9	1498.9	-3.01554	1.887	18966	26855	13952	0.0107862	0.00965302	0.00962869	0.0100226	0.000661397	0.0659903
			140	GM2 44:1;O4	[M-H]-	1526.93	1526.93	-3.02568	1.907	20564	23733	15826	0.011695	0.00853082	0.010922	0.0103826	0.00164963	0.158883
			141	GM2 42:2;O4	[M-H]-	1496.88	1496.88	-5.3912	1.879	3561	6535	3011	0.00202519	0.002349	0.00207798	0.00215073	0.000173731	0.0807779
										1758352	2782030	1449003	1	1	1
4	GM2(NeuGc)	6.1	142	GM2(NeuGc) 34:1;O2	[M-H]-	1370.78	1370.78	-1.83107	1.861	1654	4386	1446	1	1	1	1	0	0
										1654	4386	1446	1	1	1
5	O-Ac-GD3	5.9	143	O-Ac-GD3 34:1;O2	[M-2H]2-	741.902	741.904	3.06644	0.954	2934	2090	2884	0.0792117	0.117753	0.119292	0.105419	0.0227092	0.215418
			144	O-Ac-GD3 40:1;O2	[M-2H]2-	783.949	783.947	-3.28465	0.997	2131	1334	1921	0.0575324	0.0751592	0.079459	0.0707168	0.0116187	0.164299
			145	O-Ac-GD3 42:2;O2	[M-2H]2-	796.957	796.953	-4.54855	1.004	6510	3899	4405	0.175756	0.219674	0.182205	0.192545	0.0237148	0.123165
			146	O-Ac-GD3 44:2;O2	[M-2H]2-	810.973	810.967	-6.99777	1.019	3210	1653	1946	0.0866631	0.093132	0.0804931	0.0867627	0.00632007	0.0728431
			147	O-Ac-GD3 42:1;O3	[M-2H]2-	805.962	805.957	-5.96182	1.008	10675	4423	6235	0.288202	0.249197	0.2579	0.2651	0.0204748	0.0772343
			148	O-Ac-GD3 44:1;O3	[M-2H]2-	819.978	819.972	-6.65262	1.023	6751	2634	3066	0.182262	0.148403	0.12682	0.152495	0.0279468	0.183264
			149	O-Ac-GD3 42:2;O3	[M-2H]2-	804.955	804.953	-2.11813	1.007	2776	1061	2098	0.074946	0.059778	0.0867803	0.0738348	0.0135354	0.18332
			150	O-Ac-GD3 44:2;O3	[M-2H]2-	818.97	818.965	-6.6608	1.023	2053	655	1621	0.0554266	0.0369035	0.06705	0.0531267	0.0152043	0.286189
										37040	17749	24176	1	1	1
6	GD3	6.9	151	GD3 34:1;O2	[M-2H]2-	720.897	720.899	3.4679	0.94	28534	25192	4467	0.161659	0.172639	0.0816771	0.138658	0.0496518	0.358087
			152	GD3 36:1;O2	[M-2H]2-	734.913	734.916	4.15015	0.946	6899	7535	4352	0.0390863	0.0516368	0.0795743	0.0567658	0.0207256	0.365107
			153	GD3 40:1;O2	[M-2H]2-	762.944	762.943	-1.11411	0.975	11722	11844	6454	0.066411	0.0811661	0.118008	0.0885285	0.026575	0.300185
			154	GD3 41:1;O2	[M-2H]2-	769.952	769.95	-2.69497	0.982	5662	5712	2125	0.032078	0.0391439	0.0388547	0.0366922	0.0039986	0.108977
			155	GD3 34:2;O2	[M-2H]2-	719.889	719.891	2.91712	0.937	1863	3165	1469	0.0105548	0.0216895	0.02686	0.0197014	0.00833241	0.422934
			156	GD3 36:2;O2	[M-2H]2-	733.905	733.903	-2.52076	0.946	1773	3276	1598	0.0100449	0.0224502	0.0292187	0.0205713	0.009724	0.472698
			157	GD3 40:2;O2	[M-2H]2-	761.936	761.937	0.984334	0.974	3553	6631	2559	0.0201295	0.0454418	0.0467901	0.0374538	0.0150184	0.400985
			158	GD3 41:2;O2	[M-2H]2-	768.944	768.943	-1.39802	0.981	3611	4579	1500	0.0204581	0.0313796	0.0274268	0.0264215	0.00552969	0.209288
			159	GD3 42:2;O2	[M-2H]2-	775.952	775.949	-3.35072	0.992	35215	39050	13045	0.199511	0.267607	0.238522	0.235213	0.0341686	0.145266
			160	GD3 44:2;O2	[M-2H]2-	789.967	789.964	-3.98751	1.005	14716	13476	5185	0.0833735	0.0923501	0.0948054	0.0901763	0.00601798	0.0667357
			161	GD3 42:3;O2	[M-2H]2-	774.944	774.942	-2.96796	0.989	5743	7514	2373	0.032537	0.0514929	0.0433892	0.042473	0.00951113	0.223933
			162	GD3 42:1;O3	[M-2H]2-	784.957	784.955	-2.90462	0.991	28206	5958	3270	0.159801	0.0408298	0.0597905	0.0868071	0.0639215	0.736363
			163	GD3 44:1;O3	[M-2H]2-	798.973	798.968	-5.41946	1.005	18096	6582	3109	0.102523	0.045106	0.0568466	0.0681585	0.0303339	0.445049
			164	GD3 42:2;O3	[M-2H]2-	783.949	783.949	-0.739844	0.996	4988	2994	1301	0.0282595	0.0205177	0.0237882	0.0241885	0.00388641	0.160672
			165	GD3 44:2;O3	[M-2H]2-	797.965	797.96	-5.92758	1.004	5926	2415	1884	0.0335737	0.0165498	0.0344481	0.0281905	0.0100906	0.357944
										176507	145923	54691	1	1	1
7	GM1a	7.007	166	GM1a 34:1;O2	[M-H]-	1516.84	1516.83	-3.49411	1.963	56167	43824	36520	0.0273413	0.02904	0.0290226	0.028468	0.000975744	0.0342751
			167	GM1a 36:1;O2	[M-H]-	1544.87	1544.86	-3.17179	1.98	7894	5538	4651	0.00384269	0.00366976	0.00369617	0.00373621	9.31594e-05	0.0249342
			168	GM1a 38:1;O2	[M-H]-	1572.9	1572.9	-2.98811	1.996	16589	12465	15631	0.0080753	0.00825994	0.012422	0.00958576	0.00245802	0.256424
			169	GM1a 40:1;O2	[M-H]-	1600.93	1600.93	-3.62289	2.007	89871	68594	58641	0.043748	0.0454539	0.0466023	0.0452681	0.00143618	0.0317262
			170	GM1a 41:1;O2	[M-H]-	1614.95	1614.94	-4.92276	2.014	25641	22804	20562	0.0124817	0.0151111	0.0163407	0.0146445	0.00197137	0.134615
			171	GM1a 42:1;O2	[M-H]-	1628.96	1628.95	-5.4636	2.024	356471	271771	226789	0.173525	0.180089	0.18023	0.177948	0.00383107	0.0215291
			172	GM1a 43:1;O2	[M-H]-	1642.98	1642.97	-5.56915	2.038	48974	36746	34561	0.0238399	0.0243498	0.0274658	0.0252185	0.00196285	0.0778338
			173	GM1a 44:1;O2	[M-H]-	1656.99	1656.99	-5.61257	2.048	215647	149446	135646	0.104974	0.0990305	0.107799	0.103934	0.0044755	0.0430608
			174	GM1a 45:1;O2	[M-H]-	1671.01	1671	-6.97183	2.057	9584	7395	6562	0.00466536	0.0049003	0.00521485	0.00492684	0.000275704	0.0559596
			175	GM1a 46:1;O2	[M-H]-	1685.03	1685.01	-6.52809	2.066	13684	9417	7984	0.00666119	0.00624018	0.00634492	0.00641543	0.00021918	0.0341645
			176	GM1a 40:2;O2	[M-H]-	1598.92	1598.91	-4.22161	2.004	25641	17552	15674	0.0124817	0.0116309	0.0124562	0.0121896	0.000484045	0.0397097
			177	GM1a 41:2;O2	[M-H]-	1612.93	1612.93	-3.22394	2.01	19854	14790	13564	0.00966466	0.00980061	0.0107794	0.0100815	0.000608146	0.0603227
			178	GM1a 42:2;O2	[M-H]-	1626.95	1626.94	-3.65716	2.02	368941	274066	235641	0.179596	0.18161	0.187265	0.182824	0.00397612	0.0217484
			179	GM1a 43:2;O2	[M-H]-	1640.96	1640.96	-3.10793	2.034	35641	28678	25684	0.0173496	0.0190035	0.0204112	0.0189214	0.00153247	0.0809911
			180	GM1a 44:2;O2	[M-H]-	1654.98	1654.97	-3.23267	2.044	268541	201693	125643	0.130722	0.133652	0.0998491	0.121408	0.0187278	0.154255
			181	GM1a 45:2;O2	[M-H]-	1668.99	1668.99	-3.20552	2.056	10564	10076	8562	0.00514241	0.00667687	0.00680426	0.00620785	0.00092489	0.148987
			182	GM1a 46:2;O2	[M-H]-	1683.01	1683	-3.17883	2.065	18954	12593	8965	0.00922655	0.00834476	0.00712453	0.00823195	0.00105554	0.128225
			183	GM1a 42:3;O2	[M-H]-	1624.93	1624.92	-4.8002	2.014	36574	25802	26543	0.0178037	0.0170977	0.0210938	0.0186651	0.00213277	0.114265
			184	GM1a 43:3;O2	[M-H]-	1638.95	1638.94	-5.76589	2.026	8954	5174	4895	0.00435869	0.00342856	0.00389008	0.00389244	0.00046507	0.11948
			185	GM1a 44:3;O2	[M-H]-	1652.96	1652.96	-3.44835	2.038	26584	18635	15689	0.0129407	0.0123485	0.0124681	0.0125858	0.00031316	0.0248821
			186	GM1a 46:3;O2	[M-H]-	1680.99	1680.99	-4.34267	2.062	3698	3116	3564	0.00180014	0.00206482	0.00283233	0.00223243	0.000536119	0.240151
			187	GM1a 42:4;O2	[M-H]-	1622.92	1622.91	-3.29653	2.003	8654	5575	4684	0.00421265	0.00369428	0.0037224	0.00387644	0.000291505	0.0751991
			188	GM1a 44:4;O2	[M-H]-	1650.95	1650.94	-4.45199	2.033	15654	9406	7896	0.00762016	0.0062329	0.00627499	0.00670935	0.000789066	0.117607
			189	GM1a 34:0;O3	[M-H]-	1534.85	1534.84	-3.42705	1.942	28954	18291	16547	0.0140944	0.0121205	0.01315	0.0131216	0.000987241	0.0752375
			190	GM1a 42:1;O3	[M-H]-	1644.96	1644.95	-3.532	1.996	135654	89909	78965	0.0660346	0.0595783	0.0627539	0.0627889	0.00322828	0.0514148
			191	GM1a 44:1;O3	[M-H]-	1672.99	1672.98	-2.93487	2.018	72561	57543	48974	0.0353217	0.0381309	0.0389199	0.0374575	0.00189124	0.0504902
			192	GM1a 42:2;O3	[M-H]-	1642.94	1642.94	-2.34944	1.99	81452	54335	43651	0.0396497	0.0360051	0.0346897	0.0367815	0.00256957	0.0698604
			193	GM1a 44:2;O3	[M-H]-	1670.97	1670.97	-3.68647	2.009	46891	33856	25641	0.0228259	0.0224347	0.020377	0.0218792	0.00131556	0.0601283
										2054288	1509090	1258329	1	1	1
8	GM1a(NeuGc）	7.63	194	GM1a(NeuGc) 34:1;O2	[M-H]-	1532.83	1532.82	-8.48755	1.977	26581	24018	16521	1	1	1	1	0	0
										26581	24018	16521	1	1	1
9	Fuc-GM1a	7.91	195	Fuc-GM1a 34:1;O2	[M-2H]2-	830.944	830.943	-1.68483	1.06	24781	16073	19890	0.0831538	0.0630121	0.0723839	0.0728499	0.0100789	0.138352
			196	Fuc-GM1a 40:1;O2	[M-2H]2-	872.991	872.987	-4.52467	1.091	17441	15805	18951	0.0585241	0.0619614	0.0689666	0.0631507	0.00532189	0.0842728
			197	Fuc-GM1a 40:2;O2	[M-2H]2-	871.984	871.979	-5.67671	1.089	5152	5810	5986	0.0172878	0.0227773	0.0217843	0.0206165	0.00292518	0.141886
			198	Fuc-GM1a 42:2;O2	[M-2H]2-	885.999	885.994	-6.43341	1.102	53612	50235	53624	0.179898	0.19694	0.195149	0.190662	0.00936524	0.0491196
			199	Fuc-GM1a 43:2;O2	[M-2H]2-	893.007	892.999	-9.32244	1.106	10235	5810	7562	0.034344	0.0227773	0.0275197	0.0282137	0.00581448	0.206087
			200	Fuc-GM1a 44:2;O2	[M-2H]2-	900.015	900.009	-6.27767	1.111	50996	42659	45681	0.171119	0.167239	0.166243	0.1682	0.00257661	0.0153187
			201	Fuc-GM1a 42:3;O2	[M-2H]2-	884.991	884.985	-7.11871	1.098	6785	9695	9875	0.0227674	0.038008	0.0359372	0.0322375	0.00826647	0.256424
			202	Fuc-GM1a 44:3;O2	[M-2H]2-	899.007	898.999	-8.84309	1.109	7651	7174	7356	0.0256733	0.0281247	0.02677	0.026856	0.00122798	0.0457246
			203	Fuc-GM1a 34:0;O3	[M-2H]2-	839.95	839.949	-1.28579	1.058	8956	11830	13652	0.0300523	0.046378	0.0496825	0.0420376	0.0105103	0.25002
			204	Fuc-GM1a 40:0;O3	[M-2H]2-	881.997	881.992	-5.36283	1.091	7654	8056	8961	0.0256834	0.0315825	0.032611	0.0299589	0.0037383	0.124781
			205	Fuc-GM1a 42:1;O3	[M-2H]2-	895.004	894.998	-6.90499	1.099	46895	35406	36541	0.157358	0.138805	0.13298	0.143048	0.0127309	0.0889975
			206	Fuc-GM1a 44:1;O3	[M-2H]2-	909.02	909.013	-7.40358	1.108	18951	24653	24561	0.063591	0.0966489	0.0893826	0.0832075	0.0173725	0.208786
			207	Fuc-GM1a 42:2;O3	[M-2H]2-	893.997	893.994	-2.77406	1.097	26541	10902	10693	0.0890596	0.0427399	0.0389141	0.0569045	0.0279127	0.490519
			208	Fuc-GM1a 44:2;O3	[M-2H]2-	908.012	908.005	-7.52192	1.11	12364	10970	11452	0.041488	0.0430065	0.0416762	0.0420569	0.000827718	0.0196809
										298014	255078	274785	1	1	1
10	GD2	8	209	GD2 34:1;O2	[M-2H]2-	822.437	822.437	0	1.014	8011	6790	4344	0.105135	0.171907	0.122456	0.133166	0.0346506	0.260205
			210	GD2 42:2;O2	[M-2H]2-	877.491	877.488	-3.87468	1.068	13100	6687	4356	0.171923	0.1693	0.122794	0.154672	0.0276383	0.17869
			211	GD2 44:2;O2	[M-2H]2-	891.507	891.502	-6.22541	1.08	11432	5881	6512	0.150032	0.148894	0.183571	0.160832	0.0197006	0.122492
			212	GD2 34:0;O3	[M-2H]2-	831.442	831.436	-7.19232	1.014	4746	3347	3456	0.0622859	0.0847385	0.0974235	0.0814826	0.0177936	0.218373
			213	GD2 42:1;O3	[M-2H]2-	886.497	886.491	-6.18164	1.067	23148	9171	9265	0.303791	0.232189	0.261177	0.265719	0.0360167	0.135544
			214	GD2 44:1;O3	[M-2H]2-	900.512	900.507	-6.47409	1.078	15760	7622	7541	0.206832	0.192972	0.212578	0.204127	0.0100792	0.049377
										76197	39498	35474	1	1	1
11	GD1a	8.499	215	GD1a 34:1;O2	[M-2H]2-	903.463	903.464	1.10685	1.094	546385	552807	227990	0.0528831	0.0532106	0.0456766	0.0505901	0.00425838	0.0841743
			216	GD1a 36:1;O2	[M-2H]2-	917.479	917.478	-0.926452	1.103	105068	106302	71445	0.0101692	0.0102321	0.0143136	0.0115717	0.00237481	0.205226
			217	GD1a 38:1;O2	[M-2H]2-	931.494	931.492	-2.25444	1.112	104492	105720	53890	0.0101135	0.0101761	0.0107966	0.0103621	0.0003776	0.0364406
			218	GD1a 40:1;O2	[M-2H]2-	945.51	945.506	-3.75459	1.117	453797	459130	222195	0.0439217	0.0441937	0.0445156	0.0442103	0.000297263	0.00672383
			219	GD1a 41:1;O2	[M-2H]2-	952.518	952.514	-3.64823	1.122	165960	167910	83040	0.0160628	0.0161622	0.0166366	0.0162872	0.000306645	0.0188273
			220	GD1a 34:2;O2	[M-2H]2-	902.455	902.458	2.5486	1.08	22253	22514	19905	0.00215381	0.00216709	0.00398786	0.00276959	0.00105508	0.380951
			221	GD1a 36:2;O2	[M-2H]2-	916.471	916.473	2.45507	1.092	19794	20026	20170	0.00191581	0.00192761	0.00404095	0.00262812	0.00122356	0.465564
			222	GD1a 38:2;O2	[M-2H]2-	930.487	930.486	-0.429883	1.109	17292	17495	17205	0.00167364	0.00168399	0.00344693	0.00226819	0.00102083	0.450066
			223	GD1a 40:2;O2	[M-2H]2-	944.502	944.499	-3.12334	1.116	100431	101611	73565	0.00972044	0.0097806	0.0147383	0.0114131	0.00287988	0.252331
			224	GD1a 41:2;O2	[M-2H]2-	951.51	951.506	-4.07247	1.12	83740	84724	50740	0.00810496	0.00815514	0.0101655	0.00880853	0.00117543	0.133442
			225	GD1a 42:2;O2	[M-2H]2-	958.518	958.513	-5.42504	1.127	1456481	1473599	574145	0.140969	0.141842	0.115027	0.132612	0.0152358	0.11489
			226	GD1a 43:2;O2	[M-2H]2-	965.526	965.518	-7.69011	1.136	152020	153806	70880	0.0147136	0.0148046	0.0142004	0.0145729	0.000325759	0.0223538
			227	GD1a 44:2;O2	[M-2H]2-	972.534	972.528	-5.91239	1.144	1468160	1485416	553250	0.142099	0.142979	0.110841	0.131973	0.0183064	0.138713
			228	GD1a 40:3;O2	[M-2H]2-	943.494	943.491	-3.44464	1.114	16005	16193	14880	0.00154908	0.00155866	0.00298113	0.00202962	0.000824041	0.406007
			229	GD1a 42:3;O2	[M-2H]2-	957.51	957.505	-5.53519	1.124	136520	138124	91640	0.0132134	0.0132952	0.0183596	0.014956	0.00294783	0.1971
			230	GD1a 43:3;O2	[M-2H]2-	964.518	964.511	-7.49079	1.135	32207	32585	19500	0.00311723	0.00313648	0.00390672	0.00338681	0.000450359	0.132975
			231	GD1a 44:3;O2	[M-2H]2-	971.526	971.519	-7.46249	1.142	149247	151001	92465	0.0144452	0.0145346	0.0185249	0.0158349	0.00233	0.147143
			232	GD1a 42:4;O2	[M-2H]2-	956.502	956.497	-5.64557	1.122	56501	57165	56250	0.00546857	0.00550244	0.0112694	0.00741346	0.00333937	0.450446
			233	GD1a 44:4;O2	[M-2H]2-	970.518	970.515	-2.83354	1.138	120460	121875	90205	0.011659	0.0117311	0.0180721	0.0138207	0.00368196	0.266408
			234	GD1a 34:0;O3	[M-2H]2-	912.468	912.468	-0.854824	1.101	231482	234202	82935	0.0224045	0.0225432	0.0166156	0.0205211	0.00338298	0.164854
			235	GD1a 36:0;O3	[M-2H]2-	926.484	926.488	4.60882	1.107	72789	73644	35770	0.00704504	0.00708863	0.00716633	0.0071	6.14359e-05	0.00865294
			236	GD1a 38:0;O3	[M-2H]2-	940.5	940.499	-1.042	1.115	67116	67904	39390	0.00649597	0.00653612	0.00789157	0.00697455	0.000794415	0.113902
			237	GD1a 40:0;O3	[M-2H]2-	954.515	954.511	-4.6411	1.122	307205	310815	124220	0.0297335	0.0299176	0.0248868	0.0281793	0.00285287	0.10124
			238	GD1a 34:1;O3	[M-2H]2-	911.461	911.465	4.84936	1.087	66675	67458	37580	0.00645329	0.00649319	0.00752895	0.00682514	0.000609841	0.0893522
			239	GD1a 40:1;O3	[M-2H]2-	953.508	953.51	2.90506	1.121	74467	75342	86250	0.00720745	0.00725207	0.0172797	0.0105797	0.00580239	0.548443
			240	GD1a 41:1;O3	[M-2H]2-	960.515	960.521	5.46061	1.131	265795	236541	101670	0.0257256	0.0227683	0.020369	0.0229543	0.0026831	0.116889
			241	GD1a 42:1;O3	[M-2H]2-	967.523	967.517	-6.07737	1.134	1324028	1333959	625995	0.128149	0.128401	0.125415	0.127321	0.00165606	0.013007
			242	GD1a 43:1;O3	[M-2H]2-	974.531	974.539	7.79349	1.146	389654	369912	156685	0.0377135	0.035606	0.031391	0.0349035	0.00321927	0.0922335
			243	GD1a 44:1;O3	[M-2H]2-	981.539	981.532	-6.55094	1.15	1087423	1100204	434150	0.105249	0.1059	0.0869796	0.0993762	0.0107407	0.108082
			244	GD1a 42:2;O3	[M-2H]2-	966.515	966.516	0.331086	1.134	244911	247789	264155	0.0237042	0.023851	0.052922	0.0334924	0.0168267	0.502403
			245	GD1a 44:2;O3	[M-2H]2-	980.531	980.526	-5.02789	1.15	405087	409848	280555	0.0392072	0.0394501	0.0562077	0.044955	0.00974587	0.216792
			246	GD1a 42:3;O3	[M-2H]2-	965.508	965.515	7.68508	1.135	59058	57752	46830	0.00571606	0.00555894	0.00938214	0.00688571	0.0021634	0.314186
			247	GD1a 44:3;O3	[M-2H]2-	979.523	979.523	-0.132718	1.148	151865	153649	68520	0.0146986	0.0147895	0.0137276	0.0144052	0.000588606	0.0408606
			248	GD1a 42:1;O4	[M-2H]2-	975.521	975.519	-1.67603	1.141	205064	207474	109075	0.0198476	0.0199705	0.0218526	0.0205569	0.0011238	0.0546678
			249	GD1a 44:1;O4	[M-2H]2-	989.536	989.53	-6.04829	1.154	172513	174540	94260	0.016697	0.0168004	0.0188845	0.0174606	0.00123416	0.0706824
										10331945	10389036	4991400	1	1	1
12	GD1a(NeuGc)	9.2	250	GD1a(NeuGc) 34:1;O2	[M-2H]2-	911.461	911.465	4.84936	1.11	72154	76854	30960	0.197619	0.176702	0.190646	0.188322	0.0106504	0.056554
			251	GD1a(NeuGc) 42:2;O2	[M-2H]2-	966.515	966.516	0.3311	1.149	145121	168541	63265	0.397464	0.387508	0.389575	0.391516	0.00525446	0.0134208
			252	GD1a(NeuGc) 44:2;O2	[M-2H]2-	980.531	980.53	-1.25442	1.168	147842	189541	68170	0.404917	0.435791	0.419779	0.420162	0.0154405	0.0367488
										365117	434936	162395	1	1	1
13	SSEA-4 antigen	8.855	253	SSEA-4 antigen 34:1;O2	[M-2H]2-	838.942	838.939	-2.97994	1.014, 1.024	30461	37201	24800	0.070919	0.0983103	0.0934675	0.0875656	0.0146183	0.166941
			254	SSEA-4 antigen 36:1;O2	[M-2H]2-	852.957	852.954	-4.27923	1.028, 1.042	4373	5084	3365	0.0101812	0.0134354	0.0126822	0.0120996	0.00170353	0.140793
			255	SSEA-4 antigen 38:1;O2	[M-2H]2-	866.973	866.971	-2.53756	1.045	5962	6603	4561	0.0138807	0.0174496	0.0171897	0.0161733	0.00198975	0.123026
			256	SSEA-4 antigen 40:1;O2	[M-2H]2-	880.989	880.984	-5.05114	1.06	25344	14777	10562	0.0590057	0.0390509	0.0398066	0.0459544	0.0113091	0.246094
			257	SSEA-4 antigen 41:1;O2	[M-2H]2-	887.997	887.991	-6.16556	1.067	10079	8408	5789	0.0234658	0.0222196	0.0218179	0.0225011	0.000859287	0.0381886
			258	SSEA-4 antigen 34:2;O2	[M-2H]2-	837.934	837.932	-2.86419	1.02	1856	5424	4562	0.00432112	0.0143339	0.0171935	0.0119495	0.00675932	0.565657
			259	SSEA-4 antigen 40:2;O2	[M-2H]2-	879.981	879.975	-6.87515	1.06	7356	7393	6651	0.0171262	0.0195373	0.0250666	0.0205767	0.00407098	0.197844
			260	SSEA-4 antigen 41:2;O2	[M-2H]2-	886.989	886.985	-4.03049	1.065	6489	6220	5986	0.0151076	0.0164375	0.0225603	0.0180351	0.00397494	0.2204
			261	SSEA-4 antigen 42:2;O2	[M-2H]2-	893.997	893.992	-5.59286	1.073	85971	61810	43621	0.200157	0.163344	0.164401	0.175967	0.0209555	0.119088
			262	SSEA-4 antigen 43:2;O2	[M-2H]2-	901.004	900.999	-5.91007	1.078	9362	7822	5364	0.0217965	0.020671	0.0202161	0.0208946	0.000813575	0.0389372
			263	SSEA-4 antigen 44:2;O2	[M-2H]2-	908.012	908.007	-5.34134	1.085	84561	53572	36895	0.196874	0.141574	0.139052	0.159166	0.0326802	0.205321
			264	SSEA-4 antigen 42:3;O2	[M-2H]2-	892.989	892.983	-6.60703	1.065	10914	10993	2952	0.0254099	0.029051	0.0111256	0.0218622	0.00947465	0.433381
			265	SSEA-4 antigen 44:3;O2	[M-2H]2-	907.004	906.999	-5.89854	1.084	13561	16434	12968	0.0315726	0.0434298	0.0488744	0.0412923	0.00884675	0.214247
			266	SSEA-4 antigen 34:0;O3	[M-2H]2-	847.947	847.946	-1.86332	1.035	11726	17002	13564	0.0273004	0.0449308	0.0511207	0.0411173	0.0123596	0.300593
			267	SSEA-4 antigen 42:1;O3	[M-2H]2-	903.002	902.997	-5.51494	1.085	62531	53160	36789	0.145584	0.140485	0.138652	0.141574	0.00359197	0.0253717
			268	SSEA-4 antigen 44:1;O3	[M-2H]2-	917.018	917.01	-7.77521	1.094	35895	39782	27894	0.0835704	0.105131	0.105128	0.0979432	0.0124472	0.127086
			269	SSEA-4 antigen 42:2;O3	[M-2H]2-	901.994	901.999	5.67631	1.081	11478	11979	8954	0.026723	0.0316566	0.0337463	0.0307086	0.00360634	0.117437
			270	SSEA-4 antigen 44:2;O3	[M-2H]2-	916.01	916.006	-3.52616	1.091	11599	14740	10056	0.0270047	0.0389531	0.0378995	0.0346191	0.00661528	0.191088
										429518	378404	265333	1	1	1
14	HexNAc-GD1a	8.93	271	HexNAc-GD1a 34:1;O2	[M-2H]2-	1005	1005	-4.77611	1.18	19410	14184	9681	0.073804	0.105347	0.0926748	0.0906085	0.0158726	0.175178
			272	HexNAc-GD1a 40:1;O2	[M-2H]2-	1047.05	1047.04	-8.54783	1.211	22634	14911	10023	0.0860628	0.110746	0.0959488	0.097586	0.012423	0.127303
			273	HexNAc-GD1a 40:2;O2	[M-2H]2-	1046.04	1046.03	-6.93089	1.21	13561	16864	15621	0.0515639	0.125252	0.149538	0.108784	0.0510205	0.469006
			274	HexNAc-GD1a 42:2;O2	[M-2H]2-	1060.06	1060.05	-7.16942	1.22	53818	28211	20561	0.204636	0.209528	0.196828	0.203664	0.00640558	0.0314517
			275	HexNAc-GD1a 43:2;O2	[M-2H]2-	1067.07	1067.06	-7.3332	1.226	9788	5507	3651	0.0372176	0.0409014	0.0349505	0.0376898	0.0030034	0.0796873
			276	HexNAc-GD1a 44:2;O2	[M-2H]2-	1074.07	1074.07	-6.84311	1.23	46851	24303	16894	0.178145	0.180502	0.161724	0.173457	0.0102293	0.058973
			277	HexNAc-GD1a 42:3;O2	[M-2H]2-	1059.05	1059.04	-5.94873	1.216	11613	7221	4582	0.0441569	0.0536315	0.0438628	0.0472171	0.005557	0.11769
			278	HexNAc-GD1a 44:3;O2	[M-2H]2-	1073.07	1073.06	-4.24019	1.229	11654	4756	5621	0.0443128	0.0353236	0.053809	0.0444818	0.0092439	0.207813
			279	HexNAc-GD1a 34:0;O3	[M-2H]2-	1014.01	1014	-5.94177	1.187	6235	5325	5521	0.0237078	0.0395496	0.0528518	0.038703	0.0145904	0.376984
			280	HexNAc-GD1a 42:1;O3	[M-2H]2-	1069.06	1069.05	-8.34843	1.228	41789	5055	5412	0.158897	0.0375443	0.0518083	0.0827499	0.06633	0.801572
			281	HexNAc-GD1a 44:1;O3	[M-2H]2-	1083.08	1083.07	-8.10191	1.239	25641	8304	6895	0.0974965	0.0616751	0.0660049	0.0750588	0.0195518	0.260487
										262994	134641	104462	1	1	1
15	Hex-GD1a	10.068	282	Hex-GD1a 34:1;O2	[M-2H]2-	984.49	984.486	-3.04726	1.126	101664	90192	56072	0.0462222	0.0914935	0.106572	0.0814292	0.0314085	0.385715
			283	Hex-GD1a 36:1;O2	[M-2H]2-	998.505	998.499	-6.15921	1.136	19223	10592	5780	0.00873986	0.0107448	0.0109856	0.0101568	0.00123298	0.121394
			284	Hex-GD1a 38:1;O2	[M-2H]2-	1012.52	1012.52	-4.14806	1.146	21637	11460	6780	0.00983741	0.0116254	0.0128863	0.0114497	0.001532	0.133803
			285	Hex-GD1a 40:1;O2	[M-2H]2-	1026.54	1026.53	-6.18585	1.155	110559	41554	21780	0.0502664	0.0421536	0.0413957	0.0446052	0.00491733	0.110241
			286	Hex-GD1a 41:1;O2	[M-2H]2-	1033.54	1033.54	-7.32915	1.159	35993	18066	10182	0.0163645	0.0183267	0.0193522	0.0180144	0.00151814	0.0842737
			287	Hex-GD1a 34:2;O2	[M-2H]2-	983.482	983.478	-3.35543	1.126	6397	7914	4361	0.00290844	0.0080282	0.00828864	0.00640843	0.00303387	0.473419
			288	Hex-GD1a 36:2;O2	[M-2H]2-	997.497	997.491	-6.26568	1.136	5246	5895	3295	0.00238513	0.00598007	0.00626257	0.00487592	0.00216171	0.443344
			289	Hex-GD1a 40:2;O2	[M-2H]2-	1025.53	1025.52	-5.60686	1.154	33551	16348	8954	0.0152542	0.0165839	0.0170182	0.0162854	0.000919112	0.0564377
			290	Hex-GD1a 41:2;O2	[M-2H]2-	1032.54	1032.53	-7.53	1.159	19504	13194	7895	0.00886762	0.0133844	0.0150055	0.0124192	0.00318072	0.256114
			291	Hex-GD1a 42:2;O2	[M-2H]2-	1039.54	1039.54	-6.44513	1.165	452215	164824	83596	0.205603	0.167202	0.158885	0.17723	0.0249208	0.140613
			292	Hex-GD1a 43:2;O2	[M-2H]2-	1046.55	1046.55	-6.71252	1.173	44855	14538	8364	0.0203936	0.0147478	0.0158968	0.0170128	0.00298376	0.175383
			293	Hex-GD1a 44:2;O2	[M-2H]2-	1053.56	1053.55	-6.78651	1.177	364641	117022	69784	0.165786	0.118711	0.132633	0.139044	0.0241837	0.173929
			294	Hex-GD1a 46:2;O2	[M-2H]2-	1067.58	1067.57	-7.30627	1.189	20851	7599	3865	0.00948005	0.00770866	0.00734593	0.00817821	0.00114192	0.139629
			295	Hex-GD1a 42:3;O2	[M-2H]2-	1038.54	1038.53	-7.2217	1.163	55467	34442	18472	0.0252184	0.034939	0.0351084	0.0317553	0.0056617	0.178292
			296	Hex-GD1a 44:3;O2	[M-2H]2-	1052.55	1052.54	-7.17304	1.177	61862	16091	9456	0.028126	0.0163232	0.0179723	0.0208072	0.00639168	0.307186
			297	Hex-GD1a 34:0;O3	[M-2H]2-	993.495	993.49	-4.8113	1.133	40309	39380	23561	0.0183268	0.0399483	0.0447807	0.0343519	0.0140869	0.410078
			298	Hex-GD1a 36:0;O3	[M-2H]2-	1007.51	1007.5	-5.98505	1.145	8813	8480	5082	0.00400689	0.00860237	0.00965899	0.00742275	0.00300503	0.40484
			299	Hex-GD1a 38:0;O3	[M-2H]2-	1021.53	1021.52	-5.36452	1.155	12651	6890	4263	0.00575186	0.00698942	0.00810238	0.00694789	0.00117581	0.169232
			300	Hex-GD1a 40:0;O3	[M-2H]2-	1035.54	1035.54	-6.40245	1.163	73328	32756	16893	0.0333391	0.0332287	0.0321073	0.0328917	0.00068153	0.0207204
			301	Hex-GD1a 40:1;O3	[M-2H]2-	1034.53	1034.53	-0.318984	1.162	31253	15511	8271	0.0142094	0.0157348	0.0157201	0.0152214	0.000876492	0.0575828
			302	Hex-GD1a 42:1;O3	[M-2H]2-	1048.55	1048.54	-6.56144	1.175	328929	149206	68951	0.14955	0.151359	0.13105	0.143986	0.0112395	0.0780596
			303	Hex-GD1a 44:1;O3	[M-2H]2-	1062.57	1062.56	-7.27485	1.188	211813	71954	35841	0.0963022	0.0729923	0.0681204	0.0791383	0.0150626	0.190333
			304	Hex-GD1a 42:2;O3	[M-2H]2-	1047.54	1047.55	5.55586	1.172	47609	46065	23260	0.0216457	0.0467297	0.0442086	0.037528	0.0138121	0.368048
			305	Hex-GD1a 44:2;O3	[M-2H]2-	1061.56	1061.55	-4.83252	1.184	44579	28979	11987	0.0202681	0.0293972	0.0227828	0.0241494	0.00471545	0.195262
			306	Hex-GD1a 42:3;O3	[M-2H]2-	1046.53	1046.54	9.09669	1.172	46513	16823	9397	0.0211474	0.0170658	0.0178602	0.0186911	0.002164	0.115777
										2199462	985775	526142	1	1	1
16	Hex-GD1a(NeuGc)	10.8	307	Hex-GD1a(NeuGc) 34:1;O2	[M-2H]2-	992.485	992.485	-2.4988	1.134	26531	13502	7895	0.398453	0.355381	0.354195	0.369343	0.0252171	0.0682754
			308	Hex-GD1a(NeuGc) 42:2;O2	[M-2H]2-	1047.54	1047.48	5.55586	1.172	23513	10999	6541	0.353128	0.289501	0.29345	0.312026	0.0356497	0.114252
			309	Hex-GD1a(NeuGc) 44:2;O2	[M-2H]2-	1061.56	1061.48	-4.83252	1.184	16541	13492	7854	0.248419	0.355118	0.352355	0.318631	0.0608207	0.190881
										66585	37993	22290	1	1	1
17	GT1b	10.286	310	GT1b 34:1;O2	[M-2H]2-	1049.01	1049.01	-4.95705	1.156	28961	26514	12400	0.114947	0.132781	0.117239	0.121656	0.00970286	0.0797568
			311	GT1b 40:1;O2	[M-2H]2-	1091.06	1091.06	-1.32899	1.195	26124	20561	9781	0.103687	0.102969	0.0924769	0.0997108	0.00627506	0.0629326
			312	GT1b 34:2;O2	[M-2H]2-	1048	1048.01	2.57633	1.156	7684	5689	2716	0.030498	0.0284903	0.0256791	0.0282225	0.00242059	0.0857683
			313	GT1b 40:2;O2	[M-2H]2-	1090.05	1090.04	-9.21976	1.195	14561	12561	5165	0.057793	0.062905	0.0488338	0.0565106	0.00712275	0.126043
			314	GT1b 42:2;O2	[M-2H]2-	1104.07	1104.06	-8.42341	1.207	36554	34561	16520	0.145084	0.17308	0.156192	0.158119	0.0140973	0.0891563
			315	GT1b 44:2;O2	[M-2H]2-	1118.08	1118.07	-8.2731	1.216	27074	18541	8126	0.107457	0.0928526	0.0768293	0.0923798	0.0153195	0.165832
			316	GT1b 42:1;O3	[M-2H]2-	1113.07	1113.06	-7.38947	1.222	54009	34359	22324	0.214363	0.172069	0.211068	0.199166	0.0235252	0.118118
			317	GT1b 44:1;O3	[M-2H]2-	1127.09	1127.08	-7.96301	1.235	41731	24200	17314	0.165631	0.121193	0.163699	0.150175	0.0251176	0.167256
			318	GT1b 42:2;O3	[M-2H]2-	1112.06	1112.05	-7.57601	1.222	5641	7631	6407	0.0223893	0.0382158	0.0605766	0.0403939	0.0191866	0.474988
			319	GT1b 44:2;O3	[M-2H]2-	1126.08	1126.07	-9.74621	0.235	9612	15065	5014	0.0381503	0.075445	0.0474061	0.0536671	0.0194197	0.361854
							\			251951	199682	105767	1	1	1

## Sheet: MCF-7 chain composition level
Table S2. List of 220 gangliosides at the chain composition level identified in MCF-7 cells.
Number of Species	Species	Number of Chain Composition Level	Chain Dignostic Ions	Chain Composition Level	#1 %Rel Abundances	#2 %Rel Abundances	#3 %Rel Abundances	Average	SD	RSD
1	GM3 32:1;O2	1	236.2	GM3 16:1;O2/16:0	0.0725806	0.136	0.076087	0.106043	0.0423649	0.399505
		2	264.2	GM3 18:1;O2/14:0	0.927419	0.864	0.923913	0.893957	0.0423649	0.0473904
2	GM3 33:1;O2	3	250.2	GM3 17:1;O2/18:0	0.734694	0.598291	0.711538	0.654915	0.0800783	0.122273
		4	264.2	GM3 18:1;O2/15:0	0.265306	0.401709	0.288462	0.345085	0.0800783	0.232054
3	GM3 34:1;O2	5	264.2	GM3 18:1;O2/16:0	1	1	1	1	0	0
4	GM3 35:1;O2	6	250.2	GM3 17:1;O2/18:0	0.0182927	0.0544218	0.0309278	0.0426748	0.0166127	0.389286
		7	264.2	GM3 18:1;O2/17:0	0.560976	0.530612	0.57732	0.553966	0.0330271	0.0596193
		8	278.3	GM3 19:1;O2/16:0	0.420732	0.414966	0.391753	0.403359	0.0164144	0.0406941
5	GM3 36:1;O2	9	264.2	GM3 18:1;O2/18:0	0.871622	0.935484	0.89404	0.914762	0.0293054	0.0320361
		10	292.3	GM3 20:1;O2/16:0	0.128378	0.0645161	0.10596	0.0852382	0.0293054	0.343806
6	GM3 37:1;O2	11	250.2	GM3 17:1;O2/20:0	0.25	0.142857	0.238095	0.190476	0.0673435	0.353553
		12	264.2	GM3 18:1;O2/19:0	0.65625	0.742857	0.666667	0.704762	0.0538748	0.076444
		13	292.3	GM3 20:1;O2/17:0	0.09375	0.114286	0.0952381	0.104762	0.0134687	0.128565
7	GM3 38:1;O2	14	236.2	GM3 16:1;O2/22:0	0.0582524	0.0555556	0.0620155	0.0587855	0.00456787	0.077704
		15	264.2	GM3 18:1;O2/20:0	0.616505	0.65873	0.612403	0.635567	0.0327582	0.0515417
		16	292.3	GM3 20:1;O2/18:0	0.325243	0.285714	0.325581	0.305648	0.0281903	0.0922313
8	GM3 39:1;O2	17	264.2	GM3 18:1;O2/21:0	1	1	1	1	0	0
9	GM3 40:1;O2	18	236.2	GM3 16:1;O2/24:0	0.152174	0.140351	0.124224	0.132287	0.0114037	0.0862041
		19	264.2	GM3 18:1;O2/22:0	0.775362	0.815789	0.807453	0.811621	0.00589448	0.0072626
		20	292.3	GM3 20:1;O2/20:0	0.0724638	0.0438596	0.068323	0.0560913	0.0172982	0.308393
10	GM3 41:1;O2	21	250.2	GM3 17:1;O2/24:0	0.166667	0.178571	0.133333	0.155952	0.0319882	0.205115
		22	264.2	GM3 18:1;O2/23:0	0.833333	0.821429	0.866667	0.844048	0.0319882	0.0378985
11	GM3 42:1;O2	23	264.2	GM3 18:1;O2/24:0	0.926209	0.89028	0.913876	0.902078	0.0166847	0.0184959
		24	292.3	GM3 20:1;O2/22:0	0.0737913	0.10972	0.0861244	0.0979223	0.0166847	0.170387
12	GM3 43:1;O2	25	264.2	GM3 18:1;O2/25:0	0.932584	0.90566	0.882353	0.894007	0.0164808	0.0184348
		26	292.3	GM3 20:1;O2/23:0	0.0674157	0.0943396	0.117647	0.105993	0.0164808	0.155489
13	GM3 44:1;O2	27	264.2	GM3 18:1;O2/26:0	0.0955056	0.0835509	0.0371901	0.0603705	0.0327821	0.543015
		28	292.3	GM3 20:1;O2/24:0	0.904494	0.916449	0.96281	0.93963	0.0327821	0.0348883
14	GM3 45:1;O2	29	292.3	GM3 20:1;O2/25:0	1	1	1	1	0	0
15	GM3 34:2;O2	30	264.2	GM3 18:1;O2/16:1	0.256	0.260223	0.236842	0.248533	0.0165328	0.0665218
		31	262.2	GM3 18:2;O2/16:0	0.744	0.70632	0.736842	0.721581	0.0215826	0.0299102
16	GM3 36:2;O2	32	264.2	GM3 18:1;O2/18:1	0.228571	0.243902	0.433121	0.338512	0.133798	0.395253
		33	292.3	GM3 20:1;O2/16:1	0.142857	0.121951	0.0509554	0.0864533	0.0502016	0.580679
		34	262.2	GM3 18:2;O2/18:0	0.628571	0.634146	0.515924	0.575035	0.0835961	0.145376
17	GM3 38:2;O2	35	264.2	GM3 18:1;O2/20:1	0.681818	0.809524	0.782609	0.796066	0.0190319	0.0239074
		36	262.2	GM3 18:2;O2/20:0	0.318182	0.190476	0.217391	0.203934	0.0190319	0.0933237
18	GM3 40:2;O2	37	264.2	GM3 18:1;O2/22:1	0.152542	0.150735	0.197143	0.173939	0.0328151	0.188659
		38	292.3	GM3 20:1;O2/20:1	0.745763	0.746324	0.74	0.743162	0.00447141	0.00601674
		39	262.2	GM3 18:2;O2/22:0	0.101695	0.102941	0.0628571	0.0828992	0.0283437	0.341906
19	GM3 41:2;O2	40	250.2	GM3 17:1;O2/24:1	0.155556	0.281124	0.334615	0.30787	0.0378238	0.122856
		41	264.2	GM3 18:1;O2/23:1	0.588889	0.546185	0.507692	0.526939	0.0272183	0.0516536
		42	292.3	GM3 20:1;O2/21:1	0.0888889	0.0562249	0.0538462	0.0550355	0.00168203	0.0305626
		43	262.2	GM3 18:2;O2/23:0	0.166667	0.116466	0.103846	0.110156	0.00892348	0.0810077
20	GM3 42:2;O2	44	264.2	GM3 18:1;O2/24:1	0.945817	0.901654	0.935428	0.918541	0.0238812	0.0259991
		45	292.3	GM3 20:1;O2/22:1	0.0209125	0.0278799	0.0209424	0.0244112	0.00490555	0.200955
		46	262.2	GM3 18:2;O2/24:0	0.03327	0.0704657	0.04363	0.0570479	0.0189757	0.332627
21	GM3 43:2;O2	47	264.2	GM3 18:1;O2/25:1	0.318966	0.234375	0.323308	0.278842	0.0628853	0.225523
		48	278.3	GM3 19:1;O2/24:1	0.241379	0.34375	0.24812	0.295935	0.0676204	0.228497
		49	292.3	GM3 20:1;O2/23:1	0.353448	0.289062	0.360902	0.324982	0.0507984	0.156311
		50	262.3	GM3 18:2;O2/25:0	0.0862069	0.132812	0.0676692	0.100241	0.0460633	0.459526
22	GM3 44:2;O2	51	264.2	GM3 18:1;O2/26:1	0.0408163	0.0820312	0.0666667	0.074349	0.0108644	0.146127
		52	292.3	GM3 20:1;O2/24:1	0.959184	0.917969	0.933333	0.925651	0.0108644	0.011737
23	GM3 40:3;O2	53	264.2	GM3 18:1;O2/22:2	0.517241	0.511905	0.555556	0.53373	0.0308658	0.0578303
		54	292.3	GM3 20:1;O2/20:2	0.206897	0.178571	0.177778	0.178175	0.000561196	0.0031497
		55	262.2	GM3 18:2;O2/22:1	0.275862	0.309524	0.266667	0.288095	0.0303046	0.105189
24	GM3 41:3;O2	56	264.2	GM3 18:1;O2/23:2	0.736842	0.72973	0.727273	0.728501	0.00173736	0.00238485
		57	262.2	GM3 18:2;O2/23:1	0.263158	0.27027	0.272727	0.271499	0.00173736	0.00639916
25	GM3 42:3;O2	58	264.2	GM3 18:1;O2/24:2	0.457031	0.369077	0.345133	0.357105	0.0169314	0.0474128
		59	292.3	GM3 20:1;O2/22:2	0.0351562	0.032419	0.0300885	0.0312537	0.00164788	0.0527259
		60	262.2	GM3 18:2;O2/24:1	0.507812	0.598504	0.624779	0.611641	0.0185792	0.030376
26	GM3 43:3;O2	61	264.2	GM3 18:1;O2/25:2	0.68	0.705882	0.636364	0.671123	0.0491572	0.0732461
		62	262.2	GM3 18:2;O2/25:1	0.32	0.294118	0.363636	0.328877	0.0491572	0.14947
27	GM3 44:3;O2	63	264.2	GM3 18:1;O2/26:2	0.168317	0.110169	0.0989011	0.104535	0.00796796	0.0762226
		64	292.3	GM3 20:1;O2/24:2	0.594059	0.711864	0.681319	0.696592	0.0215991	0.0310068
		65	290.3	GM3 20:2;O2/24:1	0.237624	0.177966	0.21978	0.198873	0.029567	0.148673
28	GM3 42:4;O2	66	264.2	GM3 18:1;O2/24:3	1	1	1	1	0	0
29	GM3 43:4;O2	67	264.2	GM3 18:1;O2/25:3	1	1	1	1	0	0
30	GM3 44:4;O2	68	264.2	GM3 18:1;O2/26:3	0.408451	0.54	0.568966	0.554483	0.0204817	0.0369384
		69	292.3	GM3 20:1;O2/24:3	0.591549	0.46	0.431034	0.445517	0.0204817	0.0459729
31	GM3 32:0;O3	70	318.3	GM3 18:0;O3/14:0	1	1	1	1	0	0
32	GM3 34:0;O3	71	318.3	GM3 18:0;O3/16:0	1	1	1	1	0	0
33	GM3 36:0;O3	72	318.3	GM3 18:0;O3/18:0	1	1	1	1	0	0
34	GM3 40:0;O3	73	318.3	GM3 18:0;O3/22:0	1	1	1	1	0	0
35	GM3 41:0;O3	74	318.3	GM3 18:0;O3/23:0	1	1	1	1	0	0
36	GM3 42:0;O3	75	318.3	GM3 18:0;O3/24:0	1	1	1	1	0	0
37	GM3 43:0;O3	76	318.3	GM3 18:0;O3/25:0	1	1	1	1	0	0
38	GM3 34:1;O3	77	264.2	GM3 18:1;O2/16:0;O	1	1	1	1	0	0
39	GM3 36:1;O3	78	264.2	GM3 18:1;O2/18:0;O	1	1	1	1	0	0
40	GM3 40:1;O3	79	318.3	GM3 18:0;O3/22:1	1	1	1	1	0	0
41	GM3 41:1;O3	80	318.3	GM3 18:0;O3/23:1	1	1	1	1	0	0
42	GM3 42:1;O3	81	318.3	GM3 18:0;O3/24:1	1	1	1	1	0	0
43	GM3 41:2;O3	82	264.2	GM3 18:1;O2/23:1;O	1	1	1	1	0	0
44	GM3 42:2;O3	83	318.3	GM3 18:0;O3/24:2	1	1	1	1	0	0
45	GM3 43:2;O3	84	292.3	GM3 20:1;O2/23:1;O	1	1	1	1	0	0
46	GM3 44:2;O3	85	292.3	GM3 20:1;O2/24:1;O	1	1	1	1	0	0
47	GM3 42:3;O3	86	262.2	GM3 18:2;O2/24:1;O	1	1	1	1	0	0
48	GM3 44:3;O3	87	292.3	GM3 20:1;O2/24:1;O	1	1	1	1	0	0
49	GM3 34:0;O4	88	318.3	GM3 18:0;O3/16:0;O	1	1	1	1	0	0
50	GM3 40:0;O4	89	318.3	GM3 18:0;O3/22:0;O	1	1	1	1	0	0
51	GM3 42:0;O4	90	318.3	GM3 18:0;O3/24:0;O	1	1	1	1	0	0
52	GM3 44:0;O4	91	318.3	GM3 18:0;O3/26:0;O	1	1	1	1	0	0
53	GM3 42:1;O4	92	318.3	GM3 18:0;O3/24:1;O	1	1	1	1	0	0
54	GM3 44:1;O4	93	318.3	GM3 18:0;O3/26:1;O	1	1	1	1	0	0
55	GM3(NeuGc) 34:1;O2	94	264.2	GM3(NeuGc) 18:1;O2/16:0	1	1	1	1	0	0
56	GM3(NeuGc) 42:2;O2	95	264.2	GM3(NeuGc) 18:1;O2/24:1	1	1	1	1	0	0
57	GM2 32:1;O2	96	264.2	GM2 18:1;O2/14:0	1	1	1	1	0	0
58	GM2 34:1;O2	97	264.2	GM2 18:1;O2/16:0	1	1	1	1	0	0
59	GM2 36:1;O2	98	264.2	GM2 18:1;O2/18:0	1	1	1	1	0	0
60	GM2 40:1;O2	99	264.2	GM2 18:1;O2/22:0	1	1	1	1	0	0
61	GM2 42:1;O2	100	264.2	GM2 18:1;O2/24:0	1	1	1	1	0	0
62	GM2 43:1;O2	101	264.2	GM2 18:1;O2/25:0	0.737288	0.826087	0.762712	0.794399	0.044813	0.0564111
		102	292.3	GM3 20:1;O2/23:0	0.262712	0.173913	0.237288	0.205601	0.044813	0.217961
63	GM2 44:1;O2	103	292.3	GM2 20:1;O2/24:0	1	1	1	1	0	0
64	GM2 40:2;O2	104	264.2	GM2 18:1;O2/22:1	1	1	1	1	0	0
65	GM2 41:2;O2	105	250.2	GM2 17:1;O2/24:1	0.322581	0.352941	0.333333	0.343137	0.0138648	0.0404061
		106	264.2	GM2 18:1;O2/23:1	0.677419	0.647059	0.666667	0.656863	0.0138648	0.0211077
66	GM2 42:2;O2	107	264.2	GM2 18:1;O2/24:1	0.689956	0.697479	0.705628	0.701553	0.00576201	0.00821322
		108	292.3	GM2 20:1;O2/22:1	0.310044	0.302521	0.294372	0.298447	0.00576201	0.0193067
67	GM2 43:2;O2	109	292.3	GM2 20:1;O2/23:1	1	1	1	1	0	0
68	GM2 44:2;O2	110	264.2	GM2 18:1;O2/26:1	0.272727	0.248408	0.280488	0.264448	0.0226841	0.0857791
		111	292.3	GM2 20:1;O2/24:1	0.727273	0.751592	0.719512	0.735552	0.0226841	0.0308395
69	GM2 34:0;O3	112	318.3	GM2 18:0;O3/16:0	1	1	1	1	0	0
70	GM2 40:0;O3	113	318.3	GM2 18:0;O3/22:0	1	1	1	1	0	0
71	GM2 40:1;O3(18:0;O3)	114	318.3	GM2 18:0;O3/22:1	1	1	1	1	0	0
72	GM2 41:1;O3(18:0;O3)	115	318.3	GM2 18:0;O3/23:1	1	1	1	1	0	0
73	GM2 42:1;O3(18:0;O3)	116	318.3	GM2 18:0;O3/24:1	1	1	1	1	0	0
74	GM2 34:1;O3	117	264.2	GM2 18:1;O2/16:0;O	1	1	1	1	0	0
75	GM2 42:1;O3(18:1;O2)	118	264.2	GM2 18:1;O2/24:0;O	1	1	1	1	0	0
76	O-Ac-GD3 34:1;O2	119	264.2	O-Ac-GD3 18:1;O2/16:0	1	1	1	1	0	0
77	GD3 34:1;O2	120	264.2	GD3 18:1;O2/16:0	1	1	1	1	0	0
78	GD3 42:2;O2	121	264.2	GD3 18:1;O2/24:1	1	1	1	1	0	0
79	GM1a 34:1;O2	122	264.2	GM1a 18:1;O2/16:0	1	1	1	1	0	0
80	GM1a 36:1;O2	123	264.2	GM1a 18:1;O2/18:0	1	1	1	1	0	0
81	GM1a 40:1;O2	124	264.2	GM1a 18:1;O2/22:0	0.781818	0.837838	0.869565	0.853702	0.0224346	0.0262793
		125	292.3	GM1a 20:1;O2/20:0	0.218182	0.162162	0.130435	0.146298	0.0224346	0.153348
82	GM1a 41:1;O2	126	264.2	GM1a 18:1;O2/23:0	0.564103	0.842105	0.6	0.721053	0.171194	0.237423
		127	292.3	GM1a 20:1;O2/21:0	0.435897	0.157895	0.4	0.278947	0.171194	0.613715
83	GM1a 42:1;O2	128	264.2	GM1a 18:1;O2/24:0	0.803371	0.912863	0.875	0.893932	0.0267732	0.02995
		129	292.3	GM1a 20:1;O2/22:0	0.196629	0.0871369	0.125	0.106068	0.0267732	0.252415
84	GM1a 43:1;O2	130	264.2	GM1a 18:1;O2/25:0	0.808696	0.690909	0.72	0.705455	0.0205704	0.029159
		131	292.3	GM1a 20:1;O2/23:0	0.191304	0.309091	0.28	0.294545	0.0205704	0.0698377
85	GM1a 44:1;O2	132	264.2	GM1a 18:1;O2/26:0	0.15847	0.120482	0.146341	0.133412	0.0182855	0.13706
		133	292.3	GM1a 20:1;O2/24:0	0.84153	0.879518	0.853659	0.866588	0.0182855	0.0211005
86	GM1a 45:1;O2	134	292.3	GM1a 20:1;O2/25:0	1	1	1	1	0	0
87	GM1a 40:2;O2	135	264.2	GM1a 18:1;O2/22:1	1	1	1	1	0	0
88	GM1a 41:2;O2	136	264.2	GM1a 18:1;O2/23:1	1	1	1	1	0	0
89	GM1a 42:2;O2	137	264.2	GM1a 18:1;O2/24:1	0.775	0.960912	0.847458	0.904185	0.0802244	0.0887257
		138	292.3	GM1a 20:1;O2/22:1	0.225	0.0390879	0.152542	0.0958152	0.0802244	0.837283
90	GM1a 43:2;O2	139	264.2	GM1a 18:1;O2/25:1	0.473118	0.6	0.464286	0.532143	0.0959645	0.180336
		140	292.3	GM1a 20:1;O2/23:1	0.526882	0.4	0.535714	0.467857	0.0959645	0.205115
91	GM1a 44:2;O2	141	264.2	GM1a 18:1;O2/26:1	0.0657143	0.0588235	0.0576132	0.0582183	0.000855854	0.0147008
		142	292.3	GM1a 20:1;O2/24:1	0.882857	0.823529	0.91358	0.868555	0.0636756	0.0733121
		143	290.3	GM1a 20:2;O2/24:0	0.0514286	0.117647	0.0288066	0.0732268	0.0628197	0.857878
92	GM1a 45:2;O2	144	292.3	GM1a 20:1;O2/25:1	1	1	1	1	0	0
93	GM1a 46:2;O2	145	292.3	GM1a 20:1;O2/26:1	1	1	1	1	0	0
94	GM1a 42:3;O2	146	264.2	GM1a 18:1;O2/24:2	0.915094	0.955882	0.944444	0.950163	0.00808782	0.00851203
		147	292.3	GM1a 20:1;O2/22:2	0.0849057	0.0441176	0.0555556	0.0498366	0.00808782	0.162287
95	GM1a 43:3;O2	148	292.3	GM1a 20:1;O2/23:2	1	1	1	1	0	0
96	GM1a 44:3;O2	149	264.2	GM1a 18:1;O2/26:2	0.0763359	0.135593	0.0884956	0.112044	0.0333031	0.297231
		150	292.3	GM1a 20:1;O2/24:2	0.832061	0.627119	0.769912	0.698515	0.10097	0.144549
		151	290.3	GM1a 20:2;O2/24:1	0.0916031	0.237288	0.141593	0.189441	0.0676667	0.357192
97	GM1a 42:4;O2	152	264.2	GM1a 18:1;O2/24:3	1	1	1	1	0	0
98	GM1a 44:4;O2	153	264.2	GM1a 18:1;O2/26:3	0.753846	0.676471	0.689655	0.683063	0.00932291	0.0136487
		154	292.3	GM1a 20:1;O2/24:3	0.246154	0.323529	0.310345	0.316937	0.00932291	0.0294156
99	GM1a 34:0;O3	155	318.3	GM1a 18:0;O3/16:0	1	1	1	1	0	0
100	GM1a 42:1;O3	156	318.3	GM1a 18:0;O3/24:1	1	1	1	1	0	0
101	GM1a 44:1;O3	157	318.3	GM1a 18:0;O3/26:1	1	1	1	1	0	0
102	GM1a 42:2;O3	158	318.3	GM1a 18:0;O3/24:2	1	1	1	1	0	0
103	GM1a(NeuGc) 34:1;O2	159	264.2	GM1a(NeuGc) 18:1;O2/16:0	1	1	1	1	0	0
104	Fuc-GM1a 34:1;O2	160	264.2	Fuc-GM1a 18:1;O2/16:0	1	1	1	1	0	0
105	Fuc-GM1a 42:2;O2	161	264.2	Fuc-GM1a 18:1;O2/24:1	1	1	1	1	0	0
106	Fuc-GM1a 44:2;O2	162	292.3	Fuc-GM1a 20:1;O2/24:1	1	1	1	1	0	0
107	GD2 34:1;O2	163	264.2	GD2 18:1;O2/16:0	1	1	1	1	0	0
108	GD2 42:2;O2	164	264.2	GD2 18:1;O2/24:1	1	1	1	1	0	0
109	GD1a 34:1;O2	165	264.2	GD1a 18:1;O2/16:0	1	1	1	1	0	0
110	GD1a 36:1;O2	166	264.2	GD1a 18:1;O2/18:0	0.333333	0.3125	0.266667	0.289583	0.0324091	0.111916
		167	292.3	GD1a 20:1;O2/16:0	0.666667	0.6875	0.733333	0.710417	0.0324091	0.0456198
111	GD1a 38:1;O2	168	292.3	GD1a 20:1;O2/18:0	1	1	1	1	0	0
112	GD1a 40:1;O2	169	264.2	GD1a 18:1;O2/22:0	0.857143	0.866667	0.888889	0.877778	0.0157135	0.0179014
		170	292.3	GD1a 20:1;O2/20:0	0.142857	0.133333	0.111111	0.122222	0.0157135	0.128565
113	GD1a 41:1;O2	171	264.2	GD1a 18:1;O2/23:0	1	1	1	1	0	0
114	GD1a 34:2;O2	172	264.2	GD1a 18:1;O2/16:1	1	1	1	1	0	0
115	GD1a 36:2;O2	173	264.2	GD1a 18:1;O2/18:1	0.321429	0.222222	0.1875	0.204861	0.0245523	0.119849
		174	292.3	GD1a 20:1;O2/16:1	0.678571	0.777778	0.8125	0.795139	0.0245523	0.030878
116	GD1a 38:2;O2	175	264.2	GD1a 18:1;O2/20:1	1	1	1	1	0	0
117	GD1a 40:2;O2	176	264.2	GD1a 18:1;O2/22:1	1	1	1	1	0	0
118	GD1a 41:2;O2	177	264.2	GD1a 18:1;O2/23:1	1	1	1	1	0	0
119	GD1a 42:2;O2	178	264.2	GD1a 18:1;O2/24:1	0.921348	0.946809	0.941748	0.944278	0.00357862	0.0037898
		179	292.3	GD1a 20:1;O2/22:1	0.0786517	0.0531915	0.0582524	0.055722	0.00357862	0.0642229
120	GD1a 43:2;O2	180	264.2	GD1a 18:1;O2/25:1	0.633803	0.6	0.921053	0.760526	0.227018	0.298502
		181	262.2	GD1a 18:2;O2/25:0	0.366197	0.4	0.0789474	0.239474	0.227018	0.947989
121	GD1a 44:2;O2	182	264.2	GD1a 18:1;O2/26:1	0.154762	0.315217	0.333333	0.324275	0.0128099	0.0395032
		183	292.3	GD1a 20:1;O2/24:1	0.845238	0.684783	0.666667	0.675725	0.0128099	0.0189573
122	GD1a 40:3;O2	184	264.2	GD1a 18:1;O2/22:2	1	1	1	1	0	0
123	GD1a 42:3;O2	185	264.2	GD1a 18:1;O2/24:2	1	1	1	1	0	0
124	GD1a 43:3;O2	186	264.2	GD1a 18:1;O2/25:2	1	1	1	1	0	0
125	GD1a 44:3;O2	187	264.2	GD1a 18:1;O2/26:2	0.526316	0.764706	0.8	0.782353	0.0249567	0.0318996
		188	292.3	GD1a 20:1;O2/24:2	0.473684	0.235294	0.2	0.217647	0.0249567	0.114666
126	GD1a 44:4;O2	189	264.2	GD1a 18:1;O2/26:3	1	1	1	1	0	0
127	GD1a 34:0;O3	190	318.3	GD1a 18:0;O3/16:0	1	1	1	1	0	0
128	GD1a 42:1;O3	191	318.3	GD1a 18:0;O3/24:1	1	1	1	1	0	0
129	GD1a 42:1;O4	192	318.3	GD1a 18:0;O3/24:1;O	1	1	1	1	0	0
130	SSEA-4 antigen 34:1;O2	193	264.2	SSEA-4 antigen 18:1;O2/16:0	1	1	1	1	0	0
131	SSEA-4 antigen 34:2;O2	194	264.2	SSEA-4 antigen 18:1;O2/16:1	1	1	1	1	0	0
132	SSEA-4 antigen 40:2;O2	195	264.2	SSEA-4 antigen 18:1;O2/22:1	1	1	1	1	0	0
133	SSEA-4 antigen 42:2;O2	196	264.2	SSEA-4 antigen 18:1;O2/24:1	1	1	1	1	0	0
134	SSEA-4 antigen 43:2;O2	197	264.2	SSEA-4 antigen 18:1;O2/25:1	1	1	1	1	0	0
135	HexNAc-GD1a 34:1;O2	198	264.2	HexNAc-GD1a 18:1;O2/16:0	1	1	1	1	0	0
136	HexNAc-GD1a 40:2;O2	199	264.2	HexNAc-GD1a 18:1;O2/22:1	1	1	1	1	0	0
137	HexNAc-GD1a 42:2;O2	200	264.2	HexNAc-GD1a 18:1;O2/24:1	1	1	1	1	0	0
138	Hex-GD1a 34:1;O2	201	264.2	Hex-GD1a 18:1;O2/16:0	1	1	1	1	0	0
139	Hex-GD1a 36:1;O2	202	264.2	Hex-GD1a 18:1;O2/18:0	1	1	1	1	0	0
140	Hex-GD1a 40:1;O2	203	264.2	Hex-GD1a 18:1;O2/22:0	1	1	1	1	0	0
141	Hex-GD1a 41:1;O2	204	264.2	Hex-GD1a 18:1;O2/23:0	0.59375	0.464286	0.433333	0.44881	0.0218866	0.048766
		205	292.3	Hex-GD1a 20:1;O2/21:0	0.40625	0.535714	0.566667	0.55119	0.0218866	0.0397079
142	Hex-GD1a 34:2;O2	206	264.2	Hex-GD1a 18:1;O2/16:1	0.514706	0.366667	0.307692	0.337179	0.0417012	0.123676
		207	292.3	Hex-GD1a 20:1;O2/14:1	0.485294	0.633333	0.333333	0.483333	0.212132	0.438894
143	Hex-GD1a 36:2;O2	208	292.3	Hex-GD1a 20:1;O2/16:1	1	1	1	1	0	0
144	Hex-GD1a 40:2;O2	209	264.2	Hex-GD1a 18:1;O2/22:1	1	1	1	1	0	0
145	Hex-GD1a 42:2;O2	210	264.2	Hex-GD1a 18:1;O2/24:1	1	1	1	1	0	0
146	Hex-GD1a 43:2;O2	211	264.2	Hex-GD1a 18:1;O2/25:1	1	1	1	1	0	0
147	Hex-GD1a 44:2;O2	212	264.2	Hex-GD1a 18:1;O2/26:1	0.0740741	0.125	0.145833	0.135417	0.0147314	0.108786
		213	292.3	Hex-GD1a 20:1;O2/24:1	0.925926	0.875	0.854167	0.864583	0.0147314	0.0170387
148	Hex-GD1a 46:2;O2	214	292.3	Hex-GD1a 20:1;O2/26:1	1	1	1	1	0	0
149	Hex-GD1a 42:3;O2	215	264.2	Hex-GD1a 18:1;O2/24:2	1	1	1	1	0	0
150	Hex-GD1a 44:3;O2	216	264.2	Hex-GD1a 18:1;O2/26:2	0.363636	0.25	0.384615	0.317308	0.0951875	0.299985
		217	292.3	Hex-GD1a 20:1;O2/24:2	0.636364	0.75	0.615385	0.682692	0.0951875	0.13943
151	GT1b 34:1;O2	218	264.2	GT1b 18:1;O2/16:0	1	1	1	1	0	0
152	GT1b 40:1;O2	219	264.2	GT1b 18:1;O2/22:0	1	1	1	1	0	0
153	GT1b 42:2;O2	220	264.2	GT1b 18:1;O2/24:1	1	1	1	1	0	0

## Sheet: MCF-7 C=C location level
Table S3. List of 19 gangliosides at the C=C location level identified in MCF-7 cells.
Number of Species	Species	[M+H]+or[M+2H]2+	[PBM+H]+ or[PBM+2H]2+	Chain Composition Level	Number of C=C location Level	C=C location Level	PB diagnostic ions-n-yFYO	%Rel Abundances
1	GM3 40:2;O2	1235.75	1356.75	GM3 18:1;O2/22:1	1	GM3 18:1;O2/22:1(n-7)	627.5	27.8%±1.8%
				GM3 18:1;O2/22:1	2	GM3 18:1;O2/22:1(n-9)	599.5	72.2%±1.8%
2	GM3 41:2;O2	1249.78	1370.78	GM3 18:1;O2/23:1	3	GM3 18:1;O2/23:1(n-8)	627.5	/
3	GM3 42:2;O2	1263.78	1384.78	GM3 18:1;O2/24:1	4	GM3 18:1;O2/24:1(n-7)	655.6	9.9%±0.6%
				GM3 18:1;O2/24:1	5	GM3 18:1;O2/24:1(n-9)	627.5	90.1%±0.6%
4	GM3 42:3;O2	1261.77	1382.77	GM3 18:1;O2/24:2	6	GM3 18:1;O2/24:2(n-6,9)	625.5, 667.6	/
5	GM3 42:1;O3	1281.81	1402.81	GM3 18:0;O3/24:1	7	GM3 18:0;O3/24:1(n-9)	645.5	/
6	GM2 40:2;O2	1438.83	1559.83	GM2 18:1;O2/22:1	8	GM2 18:1;O2/22:1(n-7)	627.5	58.9%±1.8%
				GM2 18:1;O2/22:1	9	GM2 18:1;O2/22:1(n-9)	599.5	41.1%±1.8%
7	GM2 41:2;O2	1452.86	1573.86	GM2 18:1;O2/23:1	10	GM2 18:1;O2/23:1(n-8)	627.5	/
8	GM2 42:2;O2	1466.86	1587.86	GM2 18:1;O2/24:1	11	GM2 18:1;O2/24:1(n-7)	655.6	7.6%±1.3%
				GM2 18:1;O2/24:1	12	GM2 18:1;O2/24:1(n-9)	627.5	92.4%±1.3%
9	GM2 42:3;O2	1464.84	1585.84	GM2 18:1;O2/24:2	13	GM2 18:1;O2/24:2(n-6,9)	625.5, 667.5	/
				GM2 18:2;O3/24:1	14	GM2 18:2(n-4);O3/24:1(n-9)	627.5, 695.6	/
10	GM2 42:1;O3	1484.8	1605.8	GM2 18:0;O3/24:1	15	GM2 18:0;O3/24:1(n-9)	645.6	/
11	GM1a 40:2;O2	800.883	861.383	GM1a 18:1;O2/22:1	16	GM1a 18:1;O2/22:1(n-7)	627.5	/
12	GM1a 42:2;O2	814.883	875.383	GM1a 18:1;O2/24:1	17	GM1a 18:1;O2/24:1(n-9)	599.5	/
13	GM1a 42:3;O2	813.883	874.383	GM1a 18:1;O2/24:2	18	GM1a 18:1;O2/24:2(n-6,9)	625.5, 667.5	/
14	GD1a 42:2;O2	960.52	1021.02	GD1a 18:1;O2/24:1	19	GD1a 18:1;O2/24:1(n-9)	627.5	/

## Sheet: MCF-10A species
		Table S4. List of 319 ganglioside species identified in MCF-10A cells.
Number of Subclasses	R.T. (min)	Subclasses	Number of Species	Species	Molecular Ion	Theoretical Mass (m/z)	Measured Mass (m/z)	Mass Accuracy (ppm)	1/K0 (V·S/cm2)	#1 Int.	#2 Int.	#3 Int.	#1 %Rel Abundances	#2 %Rel Abundances	#3 %Rel Abundances	Average	SD	RSD
1	4.7	GM3	1	GM3 32:1;O2	[M-H]-	1123.67	1123.67	-0.71195	1.663	27059	23789	20155	0.0117722	0.011908	0.0178241	0.0138348	0.00345554	0.249772
			2	GM3 33:1;O2	[M-H]-	1137.69	1137.69	-2.15349	1.681	12787	11311	5654	0.00556309	0.00566192	0.00500013	0.00540838	0.000356991	0.066007
			3	GM3 34:1;O2	[M-H]-	1151.71	1151.7	-2.43118	1.694	696038	566120	396202	0.302817	0.283381	0.350382	0.312194	0.0344706	0.110414
			4	GM3 35:1;O2	[M-H]-	1165.72	1165.72	1.15808	1.711	20000	16467	6482	0.00870116	0.00824285	0.00573238	0.0075588	0.00159824	0.211441
			5	GM3 36:1;O2	[M-H]-	1179.74	1179.74	-0.423823	1.727	49948	41590	26175	0.0217303	0.0208186	0.0231479	0.0218989	0.00117379	0.0536001
			6	GM3 37:1;O2	[M-H]-	1193.75	1193.75	-1.88481	1.739	6231	6698	2822	0.00271085	0.0033528	0.00249564	0.0028531	0.000445934	0.156298
			7	GM3 38:1;O2	[M-H]-	1207.77	1207.77	-1.07637	1.756	23417	25669	16721	0.0101878	0.0128491	0.0147873	0.012608	0.00230921	0.183154
			8	GM3 40:1;O2	[M-H]-	1235.8	1235.8	2.02298	1.788	145210	118549	57673	0.0631748	0.0593418	0.0510033	0.05784	0.00622319	0.107593
			9	GM3 41:1;O2	[M-H]-	1249.82	1249.81	-1.88028	1.801	27562	24162	10130	0.0119911	0.0120947	0.0089585	0.0110148	0.00178153	0.16174
			10	GM3 42:1;O2	[M-H]-	1263.83	1263.83	-2.53198	1.815	363051	295274	117607	0.157948	0.147805	0.104006	0.136586	0.0286675	0.209886
			11	GM3 43:1;O2	[M-H]-	1277.85	1277.84	-2.6216	1.827	13732	11174	7445	0.00597422	0.00559335	0.00658401	0.00605052	0.00049972	0.0825912
			12	GM3 44:1;O2	[M-H]-	1291.86	1291.86	-2.47704	1.839	22263	18108	6407	0.0096857	0.00906428	0.00566605	0.00813868	0.00216378	0.265864
			13	GM3 34:2;O2	[M-H]-	1149.69	1149.69	0.04349	1.688	13911	11603	13187	0.00605209	0.00580809	0.011662	0.00784072	0.00331155	0.422353
			14	GM3 36:2;O2	[M-H]-	1177.72	1177.72	0.0424549	1.724	15231	13688	9009	0.00662637	0.00685177	0.00796714	0.00714843	0.000717925	0.100431
			15	GM3 38:2;O2	[M-H]-	1205.75	1205.75	1.61725	1.75	9527	8070	10133	0.0041448	0.00403958	0.00896115	0.00571518	0.00281159	0.491951
			16	GM3 40:2;O2	[M-H]-	1233.78	1233.78	-0.121577	1.774	45569	43469	43589	0.0198252	0.0217592	0.0385481	0.0267108	0.0102969	0.385495
			17	GM3 41:2;O2	[M-H]-	1247.8	1247.79	-4.56804	1.79	19562	15909	7403	0.00851061	0.00796353	0.00654687	0.00767367	0.00101345	0.132069
			18	GM3 42:2;O2	[M-H]-	1261.82	1261.81	-2.1794	1.801	435963	376481	198894	0.189669	0.188454	0.175893	0.184672	0.0076275	0.041303
			19	GM3 43:2;O2	[M-H]-	1275.83	1275.83	-2.11627	1.817	18561	14320	5846	0.00807512	0.00716813	0.00516993	0.00680439	0.00148636	0.218441
			20	GM3 44:2;O2	[M-H]-	1289.85	1289.84	-1.74439	1.831	32561	27936	11289	0.0141659	0.0139839	0.00998346	0.0127111	0.00236394	0.185975
			21	GM3 38:3;O2	[M-H]-	1203.74	1203.73	-2.15994	1.745	9521	6866	3748	0.00414219	0.0034369	0.00331456	0.00363121	0.000446725	0.123024
			22	GM3 40:3;O2	[M-H]-	1231.77	1231.77	3.32855	1.769	34584	31520	10015	0.0150461	0.0157779	0.0088568	0.0132269	0.00380228	0.287466
			23	GM3 42:3;O2	[M-H]-	1259.8	1259.8	-3.25449	1.795	102147	156212	58145	0.0444399	0.0781947	0.0514207	0.0580184	0.0178184	0.307116
			24	GM3 44:3;O2	[M-H]-	1287.83	1287.83	-1.78595	1.824	25645	23488	6216	0.0111571	0.0117573	0.00549714	0.00947052	0.00345411	0.364722
			25	GM3 42:4;O2	[M-H]-	1257.78	1257.78	-1.39134	1.788	33364	28953	10078	0.0145153	0.0144929	0.00891251	0.0126402	0.00322833	0.255401
			26	GM3 34:0;O3	[M-H]-	1169.72	1169.72	1.06009	1.676	25550	21676	18978	0.0111157	0.0108503	0.0167833	0.0129164	0.00335139	0.259467
			27	GM3 34:1;O3	[M-H]-	1167.7	1167.7	-1.03622	1.672	14253	11526	17336	0.00620088	0.00576955	0.0153311	0.00910053	0.00540018	0.593393
			28	GM3 40:1;O3	[M-H]-	1251.79	1251.79	-0.806842	1.752	7561	6084	4620	0.00328948	0.00304546	0.00408571	0.00347355	0.000544009	0.156615
			29	GM3 42:1;O3	[M-H]-	1279.83	1279.82	-2.50815	1.779	24774	22378	19651	0.0107781	0.0112017	0.0173784	0.0131194	0.00369448	0.281604
			30	GM3 42:2;O3	[M-H]-	1277.81	1277.81	-2.39472	1.775	22961	18641	9160	0.00998937	0.00933109	0.00810067	0.00914038	0.000958682	0.104884
										2298543	1997731	1130770	1	1	1
2	5.4	GM3(NeuGc)	31	GM3(NeuGc) 34:1;O2	[M-H]-	1167.7	1167.7	-0.582341	1.707	22513	16648	9218	1	1	1	#DIV/0!	#DIV/0!	#DIV/0!
										22513	16648	9218	1	1	1
3	5.4	GM2	32	GM2 32:1;O2	[M-H]-	1326.75	1326.75	-2.9395	1.823	35530	33626	22897	0.0143707	0.014471	0.0191233	0.0159883	0.00271543	0.169838
			33	GM2 33:1;O2	[M-H]-	1340.77	1340.76	-6.22777	1.834	13522	10400	5881	0.00546918	0.00447567	0.00491174	0.00490333	0.000497994	0.101562
			34	GM2 34:1;O2	[M-H]-	1354.79	1354.79	0.590499	1.848	939119	748427	434390	0.379841	0.322087	0.362797	0.351409	0.0296741	0.0844432
			35	GM2 35:1;O2	[M-H]-	1368.8	1368.8	0.255698	1.862	9366	17928	5152	0.00378823	0.00771536	0.00430289	0.00521839	0.00213433	0.409002
			36	GM2 36:1;O2	[M-H]-	1382.82	1382.81	-1.44632	1.874	46323	44248	23203	0.0187361	0.0190422	0.0193789	0.0188655	0.000321525	0.017043
			37	GM2 37:1;O2	[M-H]-	1396.83	1396.84	6.26417	1.887	3117	3422	1315	0.00126072	0.00147267	0.00109827	0.00126477	0.000187741	0.148439
			38	GM2 38:1;O2	[M-H]-	1410.85	1410.84	-4.25276	1.9	20807	25050	12071	0.00841572	0.0107803	0.0100816	0.00966409	0.00121482	0.125704
			39	GM2 39:1;O2	[M-H]-	1424.86	1424.86	-0.386002	1.913	3010	5291	1218	0.00121744	0.00227699	0.00101726	0.00148951	0.000676961	0.454485
			40	GM2 40:1;O2	[M-H]-	1438.88	1438.87	-5.28189	1.926	86428	126533	43039	0.0349572	0.0544538	0.0359457	0.0413819	0.0109822	0.265385
			41	GM2 41:1;O2	[M-H]-	1452.89	1452.89	-3.47582	1.938	14057	31912	5952	0.00568557	0.0137334	0.00497104	0.00805297	0.00486582	0.604227
			42	GM2 42:1;O2	[M-H]-	1466.91	1466.9	-4.70376	1.954	386453	357488	163447	0.156307	0.153846	0.136509	0.147428	0.0107903	0.0731904
			43	GM2 44:1;O2	[M-H]-	1494.94	1494.93	-6.82301	1.98	19936	21514	9576	0.00806343	0.0092586	0.00799776	0.00835753	0.00070975	0.0849235
			44	GM2 34:2;O2	[M-H]-	1352.77	1352.76	-3.73308	1.841	30177	30543	14878	0.0122056	0.0131443	0.0124259	0.0124687	0.000490867	0.039368
			45	GM2 36:2;O2	[M-H]-	1380.8	1380.79	-8.21987	1.871	16354	16370	9475	0.00661463	0.00704487	0.00791341	0.00712045	0.0006616	0.0929155
			46	GM2 38:2;O2	[M-H]-	1408.83	1408.82	-5.43003	1.897	12880	8734	6621	0.00520952	0.0037587	0.00552978	0.00478475	0.000943767	0.197245
			47	GM2 40:2;O2	[M-H]-	1436.86	1436.86	-2.19227	1.921	53678	49557	29036	0.0217109	0.021327	0.0242505	0.0222091	0.00158872	0.0715348
			48	GM2 41:2;O2	[M-H]-	1450.88	1450.88	-0.413542	1.931	9065	18175	5964	0.00366648	0.00782166	0.00498106	0.00543713	0.00212378	0.390606
			49	GM2 42:2;O2	[M-H]-	1464.89	1464.89	-3.31082	1.941	508457	446629	253689	0.205653	0.192208	0.211878	0.201247	0.0100536	0.0499562
			50	GM2 43:2;O2	[M-H]-	1478.91	1478.9	-3.98942	1.955	12456	15511	6258	0.00503802	0.0066752	0.00522661	0.00559174	0.000895759	0.160193
			51	GM2 44:2;O2	[M-H]-	1492.93	1492.91	-8.40631	1.968	16897	36884	15826	0.00683426	0.0158731	0.0132177	0.01186	0.0046458	0.391721
			52	GM2 38:3;O2	[M-H]-	1406.82	1406.81	-4.33603	1.895	4255	9474	2927	0.001721	0.00407716	0.0024446	0.00272134	0.00120695	0.443512
			53	GM2 40:3;O2	[M-H]-	1434.85	1434.84	-8.01479	1.919	8769	15621	7887	0.00354676	0.00672254	0.00658713	0.00556446	0.00179572	0.322713
			54	GM2 42:3;O2	[M-H]-	1462.88	1462.87	-6.90419	1.938	56581	70016	39906	0.0228851	0.0301316	0.033329	0.028501	0.00535119	0.187755
			55	GM2 44:3;O2	[M-H]-	1490.91	1490.91	-1.94512	1.962	20053	16951	7427	0.00811075	0.0072949	0.00620294	0.0071321	0.000957228	0.134214
			56	GM2 42:4;O2	[M-H]-	1460.86	1460.86	-0.239584	1.928	20111	38387	9903	0.00813421	0.0165199	0.00827087	0.0108701	0.00480254	0.441812
			57	GM2 34:0;O3	[M-H]-	1372.8	1372.79	-4.92426	1.792	30561	33458	13747	0.0123609	0.0143987	0.0114813	0.0126227	0.00149653	0.118559
			58	GM2 42:1;O3	[M-H]-	1482.91	1482.89	-8.84075	1.891	45698	42914	24412	0.0184833	0.0184681	0.0203886	0.0189257	0.00110444	0.0583569
			59	GM2 34:1;O3	[M-H]-	1370.78	1370.78	-0.517953	1.829	32561	17636	13755	0.0131698	0.0075897	0.011488	0.010642	0.00286249	0.268979
			60	GM2 42:2;O3	[M-H]-	1480.89	1480.89	-1.45858	1.931	16177	30978	7483	0.00654304	0.0133315	0.00624971	0.00862491	0.00400666	0.464545
										2472398	2323677	1197335	1	1	1
4	6.1	GM2(NeuGc)	61	GM2(NeuGc) 34:1;O2	[M-H]-	1370.78	1370.78	-0.517953	1.861	3593	4253	1502	1	1	1	#DIV/0!	#DIV/0!	#DIV/0!
										3593	4253	1502	1	1	1
5	5.92	O-Ac-GD3	62	O-Ac-GD3 34:1;O2	[M-H]-	741.902	741.903	1.04461	0.957	21172	8964	16045	0.309759	0.252628	0.310504	0.291011	0.0332619	0.114298
			63	O-Ac-GD3 40:1;O2	[M-H]-	783.949	783.95	0.924805	1	3577.5	1775	3549	0.0523409	0.050024	0.0686806	0.0570257	0.0101908	0.178706
			64	O-Ac-GD3 42:2;O2	[M-H]-	796.957	796.958	1.47436	1.007	34949.5	20513	28033	0.511331	0.578108	0.542497	0.544057	0.0333821	0.0613577
			65	O-Ac-GD3 42:3;O2	[M-H]-	795.949	795.9	-61.8444	1.006	8651	4231	4047	0.126569	0.11924	0.0783179	0.108053	0.0259761	0.240402
										68350	35483	51674	1	1	1
6	6.9	GD3	66	GD3 34:1;O2	[M-H]-	720.897	720.893	-5.54864	0.943	102488	66882	90908	0.207177	0.226478	0.228367	0.220674	0.0117272	0.0531428
			67	GD3 36:1;O2	[M-H]-	734.913	734.91	-3.19766	0.949	10783	6493	8411	0.0217975	0.0219868	0.021129	0.0216378	0.000450664	0.0208276
			68	GD3 38:1;O2	[M-H]-	748.928	748.929	0.400572	0.964	7820	7115	5348	0.0158079	0.0240931	0.0134346	0.0177785	0.00559585	0.314753
			69	GD3 40:1;O2	[M-H]-	762.944	762.94	-5.17731	0.978	32260	30100	30088	0.0652127	0.101926	0.0755832	0.0809072	0.0189267	0.233931
			70	GD3 41:1;O2	[M-H]-	769.952	769.951	-0.7468	0.985	6740	3228	6217	0.0136247	0.0109308	0.0156175	0.013391	0.00235211	0.175648
			71	GD3 40:2;O2	[M-H]-	761.936	761.935	-1.64056	0.977	19868	9403	12714	0.0401626	0.0318408	0.0319385	0.0346473	0.00477666	0.137865
			72	GD3 42:2;O2	[M-H]-	775.952	775.95	-1.93311	0.995	245564	110852	191337	0.496401	0.375371	0.480652	0.450808	0.065803	0.145967
			73	GD3 44:2;O2	[M-H]-	789.967	789.963	-5.50656	1.008	11397	7276	8683	0.0230387	0.0246383	0.0218123	0.0231631	0.00141708	0.0611783
			74	GD3 42:3;O2	[M-H]-	774.944	774.941	-3.61316	0.992	26367	25782	19126	0.0533002	0.087304	0.0480459	0.0628833	0.0213115	0.338905
			75	GD3 42:1;O3	[M-H]-	784.957	784.954	-3.66899	0.994	22451	21000	18052	0.0453841	0.071111	0.0453479	0.0539477	0.0148639	0.275524
			76	GD3 42:2;O3	[M-H]-	783.949	783.95	0.918427	0.999	8951	7182	7194	0.0180942	0.02432	0.0180718	0.020162	0.00360092	0.178599
										494689	295313	398078	1	1	1
7	7.5	GD3(NeuGc)	77	GD3(NeuGc) 34:1;O2	[M-H]-	728.894	728.88	-19.8314	0.934	5647	3521	4380	1	1	1	1	0	0
										5647	3521	4380	1	1	1
8	7.56	GM1b	78	GM1b 32:1;O2	[M-2H]2-	743.9	743.899	-1.27705	0.98	8191	1286	2950	0.0116466	0.00448143	0.00964967	0.00859257	0.00369771	0.430338
			79	GM1b 34:1;O2	[M-2H]2-	757.915	757.917	1.58329	0.993	298362	73363	122133	0.424234	0.255654	0.399506	0.359798	0.091035	0.253017
			80	GM1b 36:1;O2	[M-2H]2-	771.931	771.933	1.87841	1.004	11506	8123	6797	0.0163601	0.0283069	0.0222335	0.0223002	0.00597365	0.267875
			81	GM1b 38:1;O2	[M-2H]2-	785.947	785.947	-1.4465e-10	1.017	6907	4280	4273	0.00982091	0.0149149	0.0139773	0.0129044	0.00271118	0.210098
			82	GM1b 40:1;O2	[M-2H]2-	799.962	799.963	1.31256	1.029	32355	26197	17338	0.0460049	0.0912908	0.0567139	0.0646699	0.0236681	0.365983
			83	GM1b 41:1;O2	[M-2H]2-	806.97	806.971	0.898422	1.035	5684	7853	3907	0.00808196	0.027366	0.0127801	0.016076	0.0100556	0.625506
			84	GM1b 34:2;O2	[M-2H]2-	756.908	756.905	-3.9635	0.989	5315	2981	2713	0.00755728	0.0103881	0.00887442	0.00893995	0.00141656	0.158453
			85	GM1b 40:2;O2	[M-2H]2-	798.955	798.954	-0.0625818	1.027	15300	5906	7082	0.0217547	0.0205811	0.0231657	0.0218339	0.00129413	0.0592715
			86	GM1b 42:2;O2	[M-2H]2-	812.97	812.971	0.369017	1.04	236712	80539	96897	0.336576	0.280661	0.316957	0.311398	0.0283689	0.0911019
			87	GM1b 44:2;O2	[M-2H]2-	826.986	826.986	0.544145	1.05	7856	6668	4704	0.0111703	0.0232365	0.0153871	0.016598	0.00612358	0.368935
			88	GM1b 40:3;O2	[M-2H]2-	797.947	797.948	2.06781	1.026	12563	5521	5600	0.0178631	0.0192395	0.018318	0.0184735	0.000701264	0.0379605
			89	GM1b 42:3;O2	[M-2H]2-	811.962	811.963	0.73895	1.037	22154	42459	10151	0.0315003	0.14796	0.0332047	0.0708884	0.0667517	0.941644
			90	GM1b 42:4;O2	[M-2H]2-	810.955	810.956	1.1098	1.036	5421	6061	2207	0.007708	0.0211213	0.00721926	0.0120162	0.00788902	0.656534
			91	GM1b 34:0;O3	[M-2H]2-	766.921	766.921	0.808428	0.999	5813	2360	3277	0.00826538	0.00822409	0.0107193	0.00906959	0.00142885	0.157543
			92	GM1b 34:1;O3	[M-2H]2-	765.913	765.91	-3.49909	0.999	4001	1803	2488	0.00568894	0.00628306	0.00813843	0.00670348	0.00127772	0.190606
			93	GM1b 42:1;O3	[M-2H]2-	821.975	821.975	-0.340643	1.044	16594	6962	9007	0.0235947	0.0242611	0.0294626	0.0257728	0.00321279	0.124658
			94	GM1b 42:2;O3	[M-2H]2-	820.968	820.97	2.82593	1.044	8561	4600	4186	0.0121727	0.01603	0.0136927	0.0139651	0.00194302	0.139134
										703295	286962	305710	1	1	1
9	8.2	GM1b(NeuGc)	95	GM1b(NeuGc) 34:1;O2	[M-2H]2-	765.913	765.91	-3.49909	0.999	9451	3561	3790	0.625397	0.482128	0.606691	0.571406	0.07788	0.136295
			96	GM1b(NeuGc) 42:2;O2	[M-2H]2-	820.968	820.97	2.82593	1.044	5661	3825	2457	0.374603	0.517872	0.393309	0.428594	0.07788	0.18171
										15112	7386	6247	1	1	1
10	6.98	O-Ac-GD2	97	O-Ac-GD2 34:1;O2	[M-2H]2-	843.442	843.443	1.3931	1.03	6266	12884	19963	0.294815	0.291203	0.272689	0.286236	0.0118702	0.04147
			98	O-Ac-GD2 40:1;O2	[M-2H]2-	885.489	885.489	-0.310563	1.068	3651	7774	7837	0.171779	0.175707	0.107051	0.151513	0.0385549	0.254466
			99	O-Ac-GD2 42:2;O2	[M-2H]2-	898.497	898.495	-1.58598	1.083	7632	15784	35680	0.359085	0.356749	0.487378	0.401071	0.0747536	0.186385
			100	O-Ac-GD2 40:2;O2	[M-2H]2-	884.481	884.481	-0.537038	1.068	1352	2740	3755	0.0636116	0.0619293	0.0512922	0.0589444	0.00668012	0.113329
			101	O-Ac-GD2 42:3;O2	[M-2H]2-	897.489	897.491	2.31201	1.083	2353	5062	5973	0.110709	0.114411	0.0815894	0.102236	0.0179763	0.175831
								#DIV/0!		21254	44244	73208	1	1	1
11	8	GD2	102	GD2 32:1;O2	[M-2H]2-	808.421	808.42	-1.29883	1.013	13730	5907.02	4034	0.00990391	0.0067305	0.00744475	0.00802639	0.00166474	0.207408
			103	GD2 34:1;O2	[M-2H]2-	822.437	822.437	-0.24318	1.017	574998	269681	190421	0.414765	0.307276	0.351422	0.357821	0.0540295	0.150996
			104	GD2 35:1;O2	[M-2H]2-	829.445	829.443	-1.95914	1.021	8980	4561	1755	0.00647758	0.00519683	0.00323886	0.00497109	0.00163112	0.328121
			105	GD2 36:1;O2	[M-2H]2-	836.452	836.452	-0.777091	1.026	21271	10653.9	10075	0.0153435	0.0121392	0.0185934	0.0153587	0.00322716	0.21012
			106	GD2 37:1;O2	[M-2H]2-	843.46	843.46	-0.444597	1.03	2060	2290.29	2362	0.00148595	0.00260957	0.00435908	0.0028182	0.00144788	0.513761
			107	GD2 38:1;O2	[M-2H]2-	850.468	850.469	1.05824	1.037	10502	5618.78	6344	0.00757545	0.00640207	0.0117079	0.00856179	0.00278703	0.325519
			108	GD2 40:1;O2	[M-2H]2-	864.484	864.483	-0.520542	1.055	40513	43436.1	32812	0.0292234	0.0494913	0.0605546	0.0464231	0.0158894	0.342273
			109	GD2 41:1;O2	[M-2H]2-	871.491	871.49	-1.46301	1.063	8378	10232.1	6303	0.00604333	0.0116585	0.0116322	0.00977801	0.00323435	0.330778
			110	GD2 34:2;O2	[M-2H]2-	821.429	821.426	-3.65217	1.017	9780	5583.1	6440	0.00705464	0.00636142	0.011885	0.0084337	0.00300897	0.35678
			111	GD2 36:2;O2	[M-2H]2-	835.445	835.439	-6.52347	1.026	7235	2557.52	3614	0.00521885	0.00291406	0.00666964	0.00493418	0.00189391	0.383834
			112	GD2 38:2;O2	[M-2H]2-	849.46	849.457	-3.88482	1.037	4115	2163.62	2480	0.00296829	0.00246524	0.00457684	0.00333679	0.00110298	0.330551
			113	GD2 40:2;O2	[M-2H]2-	863.476	863.474	-2.02669	1.054	25649	16954.1	14408	0.0185015	0.0193176	0.02659	0.0214697	0.00445305	0.207411
			114	GD2 41:2;O2	[M-2H]2-	870.484	870.485	1.17751	1.062	6230	5276.02	3429	0.00449391	0.00601153	0.00632823	0.00561122	0.000980492	0.174738
			115	GD2 42:2;O2	[M-2H]2-	877.492	877.491	-0.683767	1.071	454231	335002	131622	0.327652	0.381703	0.242909	0.317421	0.0699605	0.220403
			116	GD2 43:2;O2	[M-2H]2-	884.499	884.493	-6.81176	1.078	8353	4705.87	4798	0.0060253	0.0053619	0.00885472	0.00674731	0.00185497	0.27492
			117	GD2 44:2;O2	[M-2H]2-	891.507	891.506	-1.73863	1.084	18238	19082.2	15216	0.0131557	0.0217424	0.0280812	0.0209931	0.0074909	0.356827
			118	GD2 40:3;O2	[M-2H]2-	862.468	862.47	1.9421	1.054	5796	1477.7	3593	0.00418085	0.0016837	0.00663089	0.00416515	0.00247363	0.593889
			119	GD2 42:3;O2	[M-2H]2-	876.484	876.484	0.114092	1.067	45060	22197.8	25150	0.0325033	0.0252923	0.0464144	0.0347367	0.0107367	0.309088
			120	GD2 44:3;O2	[M-2H]2-	890.499	890.5	0.280741	1.081	9901	6972.38	7944	0.00714192	0.00794437	0.0146607	0.00991565	0.00412884	0.416396
			121	GD2 42:4;O2	[M-2H]2-	875.476	875.473	-2.96981	1.066	5613	4347.25	3183	0.00404885	0.00495329	0.00587423	0.00495879	0.000912706	0.184058
			122	GD2 34:0;O3	[M-2H]2-	831.442	831.444	2.91061	1.021	18239	14124.8	9363	0.0131564	0.0160938	0.0172794	0.0155099	0.00212264	0.136857
			123	GD2 40:0;O3	[M-2H]2-	873.489	873.488	-0.721246	1.055	5816	6523	3688	0.00419528	0.00743235	0.00680621	0.00614461	0.00171696	0.279425
			124	GD2 42:1;O3	[M-2H]2-	886.497	886.497	-0.203046	1.071	43720	40442.6	33675	0.0315367	0.0460806	0.0621473	0.0465882	0.0153116	0.328658
			125	GD2 34:1;O3	[M-2H]2-	830.434	830.432	-2.62513	1.02	17227	15590.2	7875	0.0124264	0.0177635	0.0145333	0.0149078	0.00268819	0.180321
			126	GD2 40:1;O3	[M-2H]2-	872.481	872.476	-6.22363	1.055	6506	6251	3561	0.004693	0.00712243	0.00657183	0.00612909	0.0012738	0.207828
			127	GD2 42:2;O3	[M-2H]2-	885.489	885.492	3.63641	1.067	14180	16019.2	7713	0.0102285	0.0182523	0.0142344	0.0142384	0.00401191	0.281767
								#DIV/0!		1386321	877650	541858	1	1	1
12	8.5	GD2(NeuGc)	128	GD2(NeuGc) 34:1;O2	[M-2H]2-	830.434	830.432	-2.62513	1.02	8922	4554	7803	0.776434	0.583397	0.58993	0.64992	0.109613	0.168655
			129	GD2(NeuGc) 42:2;O2	[M-2H]2-	885.489	885.492	3.63641	1.067	2569	3252	5424	0.223566	0.416603	0.41007	0.35008	0.109613	0.313107
								#DIV/0!		11491	7806	13227	1	1	1
13	8.3	O-Ac-GD1b	130	O-Ac-GD1b 34:1;O2	[M-2H]2-	924.468	924.467	-1.21692	1.073	20118	5635	10003	0.341255	0.396022	0.372094	0.36979	0.0274562	0.0742481
			131	O-Ac-GD1b 42:2;O2	[M-2H]2-	979.523	979.518	-5.53841	1.122	33214	7350	13792	0.563398	0.516551	0.513038	0.530996	0.0281162	0.05295
			132	O-Ac-GD1b 42:3;O2	[M-2H]2-	978.515	978.513	-2.47824	1.119	5621	1244	3088	0.0953471	0.0874271	0.114868	0.0992141	0.0141233	0.142352
								#DIV/0!		58953	14229	26883	1	1	1
14	9	O-Ac-GD1c	133	O-Ac-GD1c 34:1;O2	[M-2H]2-	924.468	924.467	-1.21692	1.073	5288	2613	2789	0.349297	0.397777	0.409124	0.385399	0.0317766	0.082451
			134	O-Ac-GD1c 42:2;O2	[M-2H]2-	979.523	979.518	-5.53841	1.122	9851	3956	4028	0.650703	0.602223	0.590876	0.614601	0.0317766	0.0517028
				0				#DIV/0!	2.195	15139	6569	6817	1	1	1
15	8.5	GD1a	135	GD1a 32:1;O2	[M-2H]2-	889.447	889.44	-8.0387	1.091	3857.34	2106.5	2463	0.00890784	0.00721847	0.00643471	0.00752034	0.0012639	0.168064
			136	GD1a 33:1;O2	[M-2H]2-	896.455	896.454	-1.75692	1.092	3767.7	1225.5	1562	0.00870081	0.00419949	0.0040808	0.00566037	0.00263377	0.4653
			137	GD1a 34:1;O2	[M-2H]2-	903.463	903.462	-0.885482	1.097	102109	65212	80407	0.235803	0.223466	0.210067	0.223112	0.0128717	0.0576915
			138	GD1a 36:1;O2	[M-2H]2-	917.479	917.477	-2.34338	1.107	5546.57	6780.5	8228	0.0128088	0.0232351	0.021496	0.01918	0.00558572	0.291226
			139	GD1a 38:1;O2	[M-2H]2-	931.494	931.494	-0.214709	1.113	4479.01	4930.5	6083	0.0103435	0.0168956	0.0158921	0.0143771	0.00352906	0.245464
			140	GD1a 40:1;O2	[M-2H]2-	945.51	945.509	-0.793223	1.123	27209.4	16228	22107	0.0628352	0.0556094	0.0577556	0.0587334	0.00371079	0.0631803
			141	GD1a 41:1;O2	[M-2H]2-	952.518	952.515	-2.80835	1.139	7723.47	6825.5	6955	0.017836	0.0233893	0.0181703	0.0197985	0.00311422	0.157296
			142	GD1a 34:2;O2	[M-2H]2-	902.455	902.448	-8.31066	1.091	5553.99	2710.5	3476	0.0128259	0.00928823	0.00908122	0.0103985	0.0021048	0.202414
			143	GD1a 40:2;O2	[M-2H]2-	944.502	944.502	-0.582317	1.118	13745	9475.5	14069	0.0317417	0.0324702	0.0367559	0.033656	0.00270928	0.0804992
			144	GD1a 41:2;O2	[M-2H]2-	951.51	951.509	-1.55017	1.128	3467.31	4281	5222	0.00800713	0.01467	0.0136427	0.0121066	0.00358721	0.296302
			145	GD1a 42:2;O2	[M-2H]2-	958.518	958.516	-2.19088	1.131	192659	107247	145308	0.444912	0.36751	0.379624	0.397349	0.0416341	0.10478
			146	GD1b 43:2;O2	[M-2H]2-	965.526	965.524	-2.30444	1.138	3913.98	7370.5	9334	0.00903863	0.0252569	0.0243855	0.0195604	0.00912249	0.466377
			147	GD1b 44:2;O2	[M-2H]2-	972.534	972.533	-0.565533	1.142	14482.3	7730.5	11792	0.0334443	0.0264906	0.0308072	0.0302473	0.00351051	0.11606
			148	GD1a 40:3;O2	[M-2H]2-	943.494	943.493	-1.9608	1.116	2922.6	2607	3351	0.00674921	0.00893356	0.00875465	0.00814581	0.00121279	0.148886
			149	GD1a 42:3;O2	[M-2H]2-	957.51	957.509	-1.671	1.129	18812.3	17028	20979	0.0434436	0.0583508	0.0548087	0.052201	0.0077882	0.149196
			150	GD1b 44:3;O2	[M-2H]2-	971.526	971.524	-1.69836	1.141	5769.22	6230.5	7423	0.013323	0.0213504	0.0193929	0.0180221	0.00418562	0.232249
			151	GD1a 42:4;O2	[M-2H]2-	956.502	956.5	-2.61369	1.127	2673.58	3260.5	5639	0.00617414	0.0111729	0.0147322	0.0106931	0.00429914	0.402049
			152	GD1a 34:0;O3	[M-2H]2-	912.468	912.468	-0.30686	1.103	2225.35	2810.5	5200	0.00513904	0.0096309	0.0135853	0.00945173	0.00422596	0.447109
			153	GD1a 34:1;O3	[M-2H]2-	911.461	911.461	-0.0877712	1.103	1533.37	2660.5	3527	0.00354103	0.00911689	0.00921446	0.00729079	0.00324775	0.44546
			154	GD1a 42:1;O3	[M-2H]2-	967.523	967.522	-1.52968	1.136	6865.09	10622.5	13722	0.0158537	0.0364007	0.0358494	0.0293679	0.0117069	0.39863
			155	GD1a 42:2;O3	[M-2H]2-	966.515	966.516	0.64148	1.136	3711.25	4478	5921	0.00857047	0.015345	0.0154689	0.0131281	0.00394754	0.300693
								#DIV/0!		433028	291821	382768	0.999999	1	1
16	9	GD1a(NeuGc)	156	GD1a(NeuGc) 34:1;O2	[M-2H]2-	911.461	911.461	-0.0877712	1.093	1533.37	2999.5	3891	0.495914	0.479153	0.494849	0.489972	0.00938459	0.0191533
			157	GD1a(NeuGc) 42:2;O2	[M-2H]2-	966.515	966.516	0.64148	1.129	1558.85	3260.5	3972	0.504157	0.520847	0.505151	0.510052	0.00936206	0.0183551
								#DIV/0!		3092.22	6260	7863	1.00007	1	1
17	9.1	GD1b	158	GD1b 34:1;O2	[M-2H]2-	903.463	903.462	-0.885482	1.092	20767	10501	16040	0.300997	0.247613	0.26883	0.27248	0.0268788	0.0986453
			159	GD1b 40:1;O2	[M-2H]2-	945.51	945.512	2.2739	1.1223	5716	3256	5663	0.0828478	0.0767762	0.0949117	0.0848452	0.00923128	0.108801
			160	GD1b 41:1;O2	[M-2H]2-	952.518	952.518	0.446186	1.128	3532	1988	3927	0.0511929	0.0468768	0.0658164	0.0546287	0.00992624	0.181704
			161	GD1b 40:2;O2	[M-2H]2-	944.502	944.504	1.74695	1.121	3167	3212	4203	0.0459025	0.0757386	0.0704421	0.0640278	0.0159187	0.248622
			162	GD1b 42:2;O2	[M-2H]2-	958.518	958.516	-1.98223	1.13	31687	21561	26133	0.459272	0.508406	0.437988	0.468555	0.0361153	0.077078
			163	GD1b 42:3;O2	[M-2H]2-	957.51	957.51	-0.522188	1.128	4125	1891	3700	0.0597878	0.0445896	0.0620119	0.0554631	0.00948216	0.170963
										68994	42409	59666	1	1	1
18	9.25	GD1c	164	GD1c 34:1;O2	[M-2H]2-	903.463	903.462	-0.885482	1.056	31141	16531	21766	0.240938	0.271883	0.285254	0.266025	0.0227311	0.0854475
			165	GD1c 40:1;O2	[M-2H]2-	945.51	945.508	-2.59119	1.092	11849	4891	6724	0.0916758	0.0804414	0.0881212	0.0867461	0.00574201	0.0661932
			166	GD1c 40:2;O2	[M-2H]2-	944.502	944.499	-3.01746	1.091	4628	3231	4776	0.0358069	0.0531397	0.0625917	0.0505128	0.0135843	0.268928
			167	GD1c 42:2;O2	[M-2H]2-	958.518	958.515	-3.23416	1.104	59275	26896	31645	0.458611	0.442354	0.414723	0.438562	0.0221884	0.0505935
			168	GD1c 42:3;O2	[M-2H]2-	957.51	957.509	-1.671	1.102	12163	3851	4931	0.0941052	0.0633367	0.0646231	0.0740217	0.0174047	0.23513
			169	GD1c 44:2;O2	[M-2H]2-	972.534	972.529	-4.98697	1.117	5114	2651	3852	0.039567	0.0436005	0.0504823	0.04455	0.00551921	0.123888
			170	GD1c 34:0;O3	[M-2H]2-	912.468	912.466	-2.49872	1.051	1842	1120	1271	0.0142516	0.0184204	0.0166571	0.016443	0.00209267	0.127268
			171	GD1c 34:1;O3	[M-2H]2-	911.461	911.461	0.789941	1.049	3237	1631	1339	0.0250447	0.0268248	0.0175482	0.0231392	0.00492307	0.212759
										129249	60802	76304	1	1	1
19	9.9	G6 ganglioside	172	G6 ganglioside 32:1;O2	[M-2H]2-	926.466	926.461	-5.23495	1.085	2051	1867	1994	0.00968728	0.0160481	0.0150156	0.0135837	0.00341362	0.251304
			173	G6 ganglioside 34:1;O2	[M-2H]2-	940.481	940.48	-1.80758	1.097, 1.116	72473	41589	54275	0.342304	0.357484	0.408713	0.3695	0.0347967	0.0941723
			174	G6 ganglioside 36:1;O2	[M-2H]2-	954.497	954.496	-1.62389	1.113	4387	4720	4288	0.0207207	0.0405714	0.0322904	0.0311942	0.00997069	0.319633
			175	G6 ganglioside 40:1;O2	[M-2H]2-	982.528	982.526	-2.29001	1.136, 1.152	18951	16656	11838	0.0895093	0.143169	0.0891449	0.107274	0.0310862	0.289782
			176	G6 ganglioside 34:2;O2	[M-2H]2-	939.474	939.466	-8.51541	1.096	2384	2296	1994	0.0112601	0.0197356	0.0150156	0.0153371	0.00424688	0.276903
			177	G6 ganglioside 40:2;O2	[M-2H]2-	981.521	981.518	-2.90366	1.132	5812	3887	6169	0.0274512	0.0334113	0.0464551	0.0357725	0.00971947	0.271702
			178	G6 ganglioside 42:2;O2	[M-2H]2-	995.536	995.533	-3.1139	1.144, 1.162	100021	40461	44614	0.472419	0.347788	0.335961	0.38539	0.0756012	0.196168
			179	G6 ganglioside 42:3;O2	[M-2H]2-	994.529	994.528	-1.0055	1.142, 1.161	5642	4862	7623	0.0266483	0.041792	0.0574043	0.0419482	0.0153786	0.366609
										211721	116338	132795	1	1	1
20	10.26	GT1b	180	GT1b 34:1;O2	[M-2H]2-	1049.01	1049.01	-2.85984	1.159	43933	21602	35209	0.354773	0.291411	0.296969	0.314385	0.0350879	0.111608
			181	GT1b 40:1;O2	[M-2H]2-	1091.06	1091.06	-1.78726	1.199	7795	5081	7961	0.0629472	0.0685427	0.0671469	0.0662122	0.00291248	0.0439871
			182	GT1b 40:2;O2	[M-2H]2-	1090.05	1090.04	-7.10977	1.195	4047	2098	4776	0.0326808	0.028302	0.0402831	0.0337553	0.00606236	0.179597
			183	GT1b 42:2;O2	[M-2H]2-	1104.07	1104.06	-3.71355	1.208	57787	41025	59363	0.466649	0.553427	0.500696	0.506924	0.0437231	0.0862517
			184	GT1b 42:3;O2	[M-2H]2-	1103.06	1103.05	-6.43665	1.207	10272	4323	11252	0.0829498	0.0583173	0.0949047	0.0787239	0.0186562	0.236983
								#DIV/0!		123834	74129	118561	1	1	1
21	10.75	Hex(4)-HexNAc(2)-Fuc-NeuAc-Cer	185	Hex(4)-HexNAc(2)-Fuc-NeuAc-Cer 34:1;O2	[M-2H]2-	1013.51	1013.51	3.94668	1.149	62843.5	50165	46895	0.355206	0.352713	0.352356	0.353425	0.00155303	0.00439422
			186	Hex(4)-HexNAc(2)-Fuc-NeuAc-Cer 42:2;O2	[M-2H]2-	1068.57	1068.56	-5.42784	1.182	114078	92061	86195	0.644796	0.647287	0.647644	0.646576	0.00155148	0.00239953
								#DIV/0!		176921	142226	133090	1	1	1
22	11.45	Hex(5)-HexNAc(3)-NeuAc-Cer	187	Hex(5)-HexNAc(3)-NeuAc-Cer 32:1;O2	[M-2H]2-	1109.03	1109.02	-6.80774	1.19	2462	2612	3513	0.0140138	0.017446	0.022576	0.0180119	0.00430904	0.239233
			188	Hex(5)-HexNAc(3)-NeuAc-Cer 34:1;O2	[M-2H]2-	1123.05	1123.04	-3.38365	1.200, 1.214	72270	56546	54169	0.411364	0.377681	0.348112	0.379052	0.0316481	0.0834928
			189	Hex(5)-HexNAc(3)-NeuAc-Cer 36:1;O2	[M-2H]2-	1137.06	1137.06	-4.26537	1.214, 1.225	4278	3348	4231	0.0243505	0.0223619	0.0271901	0.0246342	0.00242658	0.0985045
			190	Hex(5)-HexNAc(3)-NeuAc-Cer 40:1;O2	[M-2H]2-	1165.09	1165.09	-3.81943	1.235, 1.247	14873	11645	16538	0.0846577	0.077779	0.10628	0.0895722	0.0148724	0.166038
			191	Hex(5)-HexNAc(3)-NeuAc-Cer 40:2;O2	[M-2H]2-	1164.09	1164.08	-5.36902	1.235, 1.244	4323	7670	8104	0.0246067	0.0512293	0.0520796	0.0426385	0.0156218	0.366378
			192	Hex(5)-HexNAc(3)-NeuAc-Cer 42:2;O2	[M-2H]2-	1178.1	1178.1	-4.66852	1.245, 1.255	69473	61542	61157	0.395443	0.41105	0.39302	0.399838	0.00978561	0.024474
			193	Hex(5)-HexNAc(3)-NeuAc-Cer 42:3;O2	[M-2H]2-	1177.09	1177.09	-4.07784	1.243, 1.253	8005	6356	7896	0.0455648	0.0424529	0.0507429	0.0462535	0.00418771	0.0905382
										175684	149719	155608	1	1	1
23	12	Hex(5)-HexNAc(3)-Fuc-NeuAc-Cer	194	Hex(5)-HexNAc(3)-Fuc-NeuAc-Cer 34:1;O2	[M-2H]2-	1196.08	1196.07	-3.34427	1.244, 1.265	64916	35849	69630	0.317517	0.398366	0.337206	0.35103	0.0421603	0.120105
			195	Hex(5)-HexNAc(3)-Fuc-NeuAc-Cer 36:1;O2	[M-2H]2-	1210.09	1210.09	-4.25587	1.256, 1.277	4261	2646.44	5621	0.0208414	0.0294082	0.0272215	0.0258237	0.00445118	0.172368
			196	Hex(5)-HexNAc(3)-Fuc-NeuAc-Cer 40:1;O2	[M-2H]2-	1238.12	1238.12	-4.72489	1.276, 1.097	15613	8242.22	16257	0.0763662	0.0915904	0.0787298	0.0822288	0.00819307	0.0996374
			197	Hex(5)-HexNAc(3)-Fuc-NeuAc-Cer 34:2;O2	[M-2H]2-	1195.07	1195.06	-8.4514	1.242	2163	1165.95	2631	0.0105797	0.0129565	0.0127415	0.0120925	0.0013146	0.108711
			198	Hex(5)-HexNAc(3)-Fuc-NeuAc-Cer 40:2;O2	[M-2H]2-	1237.12	1237.11	-5.77957	1.274, 1.295	6756	3826.74	9851	0.0330449	0.042524	0.0477067	0.0410919	0.00743506	0.180938
			199	Hex(5)-HexNAc(3)-Fuc-NeuAc-Cer 42:2;O2	[M-2H]2-	1251.13	1251.12	-5.67486	1.285, 1.306	89652	32288	79043	0.438505	0.358795	0.382792	0.393364	0.0408932	0.103958
			200	Hex(5)-HexNAc(3)-Fuc-NeuAc-Cer 42:3;O2	[M-2H]2-	1250.12	1250.12	-5.11949	1.283, 1.305	13526	4808.63	17518	0.0661583	0.0534351	0.0848366	0.0681434	0.0157946	0.231785
			201	Hex(5)-HexNAc(3)-Fuc-NeuAc-Cer 42:4;O2	[M-2H]2-	1249.12	1249.11	-4.96351	1.281	7562	1163	5940	0.0369872	0.0129237	0.0287664	0.0262258	0.0122313	0.466385
										204449	89990	206491	1	1	1
24	12.2	Hex(5)-HexNAc(3)-NeuAc(2)-Cer	202	Hex(5)-HexNAc(3)-NeuAc(2)-Cer 34:1;O2	[M-2H]2-	1268.6	1268.59	-4.65081	1.295	108093	61884	79797	0.197298	0.198663	0.213046	0.203002	0.00872491	0.0429794
			203	Hex(5)-HexNAc(3)-NeuAc(2)-Cer 36:1;O2	[M-2H]2-	1282.61	1282.61	-2.61186	1.308	9986	6000	7445	0.0182271	0.0192615	0.019877	0.0191218	0.0008338	0.0436046
			204	Hex(5)-HexNAc(3)-NeuAc(2)-Cer 38:1;O2	[M-2H]2-	1296.63	1296.62	-5.09013	1.318	9862	4549	5828	0.0180007	0.0146034	0.0155599	0.0160547	0.00175188	0.109119
			205	Hex(5)-HexNAc(3)-NeuAc(2)-Cer 40:1;O2	[M-2H]2-	1310.64	1310.64	-4.92125	1.328	42561	25000	30778	0.0776849	0.080256	0.0821726	0.0800379	0.00225179	0.0281341
			206	Hex(5)-HexNAc(3)-NeuAc(2)-Cer 40:2;O2	[M-2H]2-	1309.63	1309.63	-6.91033	1.325	26512	11596	16704	0.0483913	0.037226	0.0445972	0.0434048	0.00567737	0.1308
			207	Hex(5)-HexNAc(3)-NeuAc(2)-Cer 42:2;O2	[M-2H]2-	1323.65	1323.64	-5.81725	1.339	256212	136521	150935	0.467654	0.438265	0.402974	0.436298	0.0323849	0.0742265
			208	Hex(5)-HexNAc(3)-NeuAc(2)-Cer 44:2;O2	[M-2H]2-	1337.65	1337.66	6.72822	1.346	14810	9521	11209	0.0270321	0.0305647	0.0299263	0.0291744	0.00188252	0.0645266
			209	Hex(5)-HexNAc(3)-NeuAc(2)-Cer 42:3;O2	[M-2H]2-	1322.64	1322.63	-7.2582	1.335	24510	15462	21181	0.0447371	0.0496368	0.0565501	0.050308	0.00593501	0.117973
			210	Hex(5)-HexNAc(3)-NeuAc(2)-Cer 44:3;O2	[M-2H]2-	1336.64	1336.65	6.8081	1.341	8651	6594	8063	0.0157903	0.0211683	0.021527	0.0194952	0.00321354	0.164837
			211	Hex(5)-HexNAc(3)-NeuAc(2)-Cer 42:4;O2	[M-2H]2-	1321.63	1321.63	-3.17788	1.335	7506	7142	7069	0.0137004	0.0229275	0.0188732	0.0185004	0.00462485	0.249987
			212	Hex(5)-HexNAc(3)-NeuAc(2)-Cer 34:0;O3	[M-2H]2-	1277.6	1277.6	1.58109	1.285	8961	6321	8789	0.0163562	0.0202919	0.0234653	0.0200378	0.00356138	0.177733
			213	Hex(5)-HexNAc(3)-NeuAc(2)-Cer 34:1;O3	[M-2H]2-	1276.59	1276.6	7.14402	1.285	8999	7021	9016	0.0164255	0.0225391	0.0240714	0.021012	0.00404522	0.192519
			214	Hex(5)-HexNAc(3)-NeuAc(2)-Cer 42:1;O3	[M-2H]2-	1332.66	1332.65	-3.51179	1.33	14521	10031	12806	0.0265046	0.0322019	0.0341901	0.0309655	0.00398913	0.128825
			215	Hex(5)-HexNAc(3)-NeuAc(2)-Cer 42:2;O3	[M-2H]2-	1331.65	1331.65	-1.71216	1.33	6683	3861	4933	0.0121982	0.0123947	0.0131704	0.0125878	0.000514018	0.0408347
										547867	311503	374553	1	1	1

## Sheet: MCF-10A chain composition level
Table S5. List of 122 gangliosides at the chain composition level identified in MCF-10A cells.
Number of Species	Species	Number of Chain Composition Level	Chain Dignostic Ions	Chain Composition Level	#1 %Rel Abundances	#2 %Rel Abundances	#3 %Rel Abundances	Average	SD	RSD
1	GM3 32:1;O2	1	236.2	GM3 16:1;O2/16:0	0.0866142	0.0686275	0.0549451	0.0700622	0.0158832	0.226702
		2	264.2	GM3 18:1;O2/14:0	0.913386	0.931373	0.945055	0.929938	0.0158832	0.0170799
2	GM3 33:1;O2	3	250.2	GM3 17:1;O2/16:0	0.700855	0.583333	0.710744	0.664977	0.0708784	0.106588
		4	264.2	GM3 18:1;O2/15:0	0.299145	0.416667	0.289256	0.335023	0.0708784	0.211563
3	GM3 34:1;O2	5	236.2	GM3 16:1;O2/18:0	0.0046875	0.00155272	0.0040633	0.00343451	0.00165929	0.483123
		6	264.2	GM3 18:1;O2/16:0	0.995313	0.998447	0.995937	0.996565	0.00165929	0.00166501
4	GM3 35:1;O2	7	264.2	GM3 18:1;O2/17:0	0.87218	0.924528	0.891304	0.896004	0.0264885	0.0295629
		8	278.3	GM3 19:1;O2/16:0	0.12782	0.0754717	0.108696	0.103996	0.0264885	0.254708
5	GM3 36:1;O2	9	236.2	GM3 16:1;O2/20:0	0.0257235	0.0467626	0.0694444	0.0473102	0.0218656	0.462176
		10	264.2	GM3 18:1;O2/18:0	0.974277	0.953237	0.930556	0.95269	0.0218656	0.0229515
6	GM3 37:1;O2	11	264.2	GM3 18:1;O2/19:0	1	1	1	1	0	0
7	GM3 38:1;O2	12	264.2	GM3 18:1;O2/20:0	0.97549	0.884615	0.907216	0.922441	0.0473116	0.0512896
		13	292.3	GM3 20:1;O2/18:0	0.0245098	0.115385	0.0927835	0.0775593	0.0473116	0.610006
8	GM3 40:1;O2	14	264.2	GM3 18:1;O2/22:0	1	1	1	1	0	0
9	GM3 41:1;O2	15	264.2	GM3 18:1;O2/23:0	1	1	1	1	0	0
10	GM3 42:1;O2	16	264.2	GM3 18:1;O2/24:0	1	1	1	1	0	0
11	GM3 43:1;O2	17	264.2	GM3 18:1;O2/25:0	1	1	1	1	0	0
12	GM3 44:1;O2	18	264.2	GM3 18:1;O2/26:0	0.794872	0.7	0.8125	0.769124	0.0605085	0.078672
		19	292.3	GM3 20:1;O2/24:0	0.205128	0.3	0.1875	0.230876	0.0605085	0.262082
13	GM3 34:2;O2	20	264.2	GM3 18:1;O2/16:1	0.222749	0.297753	0.235772	0.252091	0.0400766	0.158976
		21	262.2	GM3 18:2;O2/16:0	0.777251	0.702247	0.764228	0.747909	0.0400766	0.0535848
14	GM3 36:2;O2	22	264.2	GM3 18:1;O2/18:1	0.728261	0.666667	0.747253	0.71406	0.0421281	0.058998
		23	262.2	GM3 18:2;O2/18:0	0.271739	0.333333	0.252747	0.28594	0.0421281	0.147332
15	GM3 38:2;O2	24	264.2	GM3 18:1;O2/20:1	0.702128	0.666667	0.764706	0.711167	0.0496407	0.0698018
		25	262.2	GM3 18:2;O2/20:0	0.297872	0.333333	0.235294	0.288833	0.0496407	0.171866
16	GM3 40:2;O2	26	264.2	GM3 18:1;O2/22:1	0.709302	0.71831	0.653333	0.693649	0.0352032	0.0507508
		27	262.2	GM3 18:2;O2/22:0	0.290698	0.28169	0.346667	0.306351	0.0352032	0.114911
17	GM3 41:2;O2	28	264.2	GM3 18:1;O2/23:1	0.697674	0.892857	0.863636	0.818056	0.105272	0.128686
		29	262.2	GM3 18:2;O2/23:0	0.302326	0.107143	0.136364	0.181944	0.105272	0.578597
18	GM3 42:2;O2	30	264.2	GM3 18:1;O2/24:1	0.850352	0.934186	0.946512	0.91035	0.0523239	0.0574767
		31	262.2	GM3 18:2;O2/24:0	0.149648	0.0658135	0.0534884	0.0896499	0.0523239	0.583647
19	GM3 43:2;O2	32	264.2	GM3 18:1;O2/25:1	0.707692	0.666667	0.744186	0.706182	0.0387818	0.0549175
		33	262.2	GM3 18:2;O2/25:0	0.292308	0.333333	0.255814	0.293818	0.0387818	0.131992
20	GM3 44:2;O2	34	264.2	GM3 18:1;O2/26:1	0.578125	0.625	0.632653	0.611926	0.0295216	0.0482437
		35	292.3	GM3 20:1;O2/24:1	0.421875	0.375	0.367347	0.388074	0.0295216	0.0760721
21	GM3 38:3;O2	36	264.2	GM3 18:1;O2/20:2	0.875	0.813953	0.782609	0.823854	0.0469846	0.0570303
		37	262.2	GM3 18:2;O2/20:1	0.125	0.186047	0.217391	0.176146	0.0469846	0.266737
22	GM3 40:3;O2	38	264.2	GM3 18:1;O2/22:2	0.886555	0.903226	0.894737	0.894839	0.00833606	0.00931571
		39	262.2	GM3 18:2;O2/22:1	0.113445	0.0967742	0.105263	0.105161	0.00833606	0.0792696
23	GM3 42:3;O2	40	264.2	GM3 18:1;O2/24:2	0.862702	0.938144	0.928205	0.909684	0.0409899	0.0450595
		41	262.2	GM3 18:2;O2/24:1	0.137298	0.0618557	0.0717949	0.0903162	0.0409899	0.453848
24	GM3 44:3;O2	42	264.2	GM3 18:1;O2/26:2	1	1	1	1	0	0
25	GM3 42:4;O2	43	264.2	GM3 18:1;O2/24:3	0.417391	0.390411	0.333333	0.380379	0.0429176	0.112829
		44	262.2	GM3 18:2;O2/24:2	0.582609	0.609589	0.666667	0.619621	0.0429176	0.0692643
26	GM3 34:0;O3	45	318.3	GM3 18:0;O3/16:0	1	1	1	1	0	0
27	GM3 34:1;O3	46	264.2	GM3 18:1;O2/16:0;O	1	1	1	1	0	0
28	GM3 42:1;O3	47	318.3	GM3 18:0;O3/24:1	1	1	1	1	0	0
29	GM3 42:2;O3	48	318.3	GM3 18:0;O3/24:2	1	1	1	1	0	0
30	GM3(NeuGc) 34:1;O2	49	264.2	GM3(NeuGc) 18:1;O2/16:0	1	1	1	1	0	0
31	GM2 32:1;O2	50	264.2	GM2 18:1;O2/14:0	1	1	1	1	0	0
32	GM2 33:1;O2	51	264.2	GM2 18:1;O2/15:0	1	1	1	1	0	0
33	GM2 34:1;O2	52	264.2	GM2 18:1;O2/16:0	1	1	1	1	0	0
34	GM2 35:1;O2	53	264.2	GM2 18:1;O2/17:0	1	1	1	1	0	0
35	GM2 36:1;O2	54	264.2	GM2 18:1;O2/18:0	1	1	1	1	0	0
36	GM2 40:1;O2	55	264.2	GM2 18:1;O2/22:0	1	1	1	1	0	0
37	GM2 42:1;O2	56	264.2	GM2 18:1;O2/24:0	1	1	1	1	0	0
38	GM2 44:1;O2	57	264.2	GM2 18:1;O2/26:0	1	1	1	1	0	0
39	GM2 34:2;O2	58	264.2	GM2 18:1;O2/16:1	1	1	1	1	0	0
40	GM2 40:2;O2	59	264.2	GM2 18:1;O2/22:1	1	1	1	1	0	0
41	GM2 42:2;O2	60	264.2	GM2 18:1;O2/24:1	0.656863	0.696246	0.673469	0.675526	0.0197719	0.0292689
		61	262.2	GM2 18:2;O2/24:0	0.343137	0.303754	0.326531	0.324474	0.0197719	0.0609352
42	GM2 44:2;O2	62	264.2	GM2 18:1;O2/26:1	1	1	1	1	0	0
43	GM2 40:3;O2	63	264.2	GM2 18:1;O2/22:2	1	1	1	1	0	0
44	GM2 42:3;O2	64	264.2	GM2 18:1;O2/24:2	0.741935	0.708333	0.722222	0.724164	0.016885	0.0233165
		65	262.2	GM2 18:2;O2/24:1	0.258065	0.291667	0.277778	0.275836	0.016885	0.0612138
45	GM1b 34:1;O2	66	264.2	GM1b 18:1;O2/16:0	1	1	1	1	0	0
46	GM1b 40:1;O2	67	264.2	GM1b 18:1;O2/22:0	1	1	1	1	0	0
47	GM1b 41:1;O2	68	264.2	GM1b 18:1;O2/23:0	1	1	1	1	0	0
48	GM1b 34:2;O2	69	264.2	GM1b 18:1;O2/16:1	1	1	1	1	0	0
49	GM1b 40:2;O2	70	264.2	GM1b 18:1;O2/22:1	1	1	1	1	0	0
50	GM1b 42:2;O2	71	264.2	GM1b 18:1;O2/24:1	1	1	1	1	0	0
51	GM1b 42:3;O2	72	264.2	GM1b 18:1;O2/24:2	1	1	1	1	0	0
52	GM1b 34:1;O3	73	264.2	GM1b 18:1;O2/16:0;O	1	1	1	1	0	0
53	GM1b(NeuGc) 34:1;O2	74	264.2	GM1b(NeuGc) 18:1;O2/16:0	1	1	1	1	0	0
54	GM1b(NeuGc) 42:2;O2	75	264.2	GM1b(NeuGc) 18:1;O2/24:1	1	1	1	1	0	0
55	O-Ac-GD2 34:1;O2	76	264.2	O-Ac-GD2 18:1;O2/16:0	1	1	1	1	0	0
56	O-Ac-GD2 40:1;O2	77	264.2	O-Ac-GD2 18:1;O2/22:0	1	1	1	1	0	0
57	O-Ac-GD2 42:2;O2	78	264.2	O-Ac-GD2 18:1;O2/24:0	1	1	1	1	0	0
58	O-Ac-GD2 40:2;O2	79	264.2	O-Ac-GD2 18:1;O2/22:1	1	1	1	1	0	0
59	GD2 34:1;O2	80	264.2	GD2 18:1;O2/16:0	1	1	1	1	0	0
60	GD2 35:1;O2	81	264.2	GD2 18:1;O2/17:0	1	1	1	1	0	0
61	GD2 40:1;O2	82	264.2	GD2 18:1;O2/22:0	1	1	1	1	0	0
62	GD2 34:2;O2	83	264.2	GD2 18:1;O2/16:1	1	1	1	1	0	0
63	GD2 40:2;O2	84	264.2	GD2 18:1;O2/22:1	1	1	1	1	0	0
64	GD2 42:2;O2	85	264.2	GD2 18:1;O2/24:1	1	1	1	1	0	0
65	GD2 42:3;O2	86	264.2	GD2 18:1;O2/24:2	1	1	1	1	0	0
66	GD2 34:1;O3	87	264.2	GD2 18:1;O2/16:0;O	1	1	1	1	0	0
67	GD2(NeuGc) 34:1;O2	88	264.2	GD2(NeuGc) 18:1;O2/16:0	1	1	1	1	0	0
68	GD2(NeuGc) 42:2;O2	89	264.2	GD2(NeuGc) 18:1;O2/24:1	1	1	1	1	0	0
69	O-Ac-GD1a 42:2;O2	90	264.2	O-Ac-GD1a 18:1;O2/24:1	1	1	1	1	0	0
70	GD1a 33:1;O2	91	264.2	GD1a 18:1;O2/15:0	1	1	1	1	0	0
71	GD1a 34:1;O2	92	264.2	GD1a 18:1;O2/16:0	1	1	1	1	0	0
72	GD1a 36:1;O2	93	264.2	GD1a 18:1;O2/18:0	1	1	1	1	0	0
73	GD1a 38:1;O2	94	264.2	GD1a 18:1;O2/20:0	1	1	1	1	0	0
74	GD1a 40:1;O2	95	264.2	GD1a 18:1;O2/22:0	1	1	1	1	0	0
75	GD1a 41:1;O2	96	264.2	GD1a 18:1;O2/23:0	1	1	1	1	0	0
76	GD1a 34:2;O2	97	264.2	GD1a 18:1;O2/16:1	1	1	1	1	0	0
77	GD1a 40:2;O2	98	264.2	GD1a 18:1;O2/22:1	1	1	1	1	0	0
78	GD1a 41:2;O2	99	264.2	GD1a 18:1;O2/23:1	1	1	1	1	0	0
79	GD1a 42:2;O2	100	264.2	GD1a 18:1;O2/24:1	1	1	1	1	0	0
80	GD1b 43:2;O2	101	264.2	GD1a 18:1;O2/25:1	1	1	1	1	0	0
81	GD1b 44:2;O2	102	264.2	GD1a 18:1;O2/26:1	1	1	1	1	0	0
82	GD1a 40:3;O2	103	264.2	GD1a 18:1;O2/22:2	1	1	1	1	0	0
83	GD1a 42:3;O2	104	264.2	GD1a 18:1;O2/24:2	1	1	1	1	0	0
84	GD1b 44:3;O2	105	264.2	GD1a 18:1;O2/26:2	1	1	1	1	0	0
85	GD1a 42:4;O2	106	264.2	GD1a 18:1;O2/24:3	1	1	1	1	0	0
86	GD1a 34:0;O3	107	318.3	GD1a 18:0;O3/16:0	1	1	1	1	0	0
87	GD1a 34:1;O3	108	264.2	GD1a 18:1;O2/16:0;O	1	1	1	1	0	0
88	GD1a(NeuGc) 34:1;O2	109	264.2	GD1a(NeuGc) 18:1;O2/16:0	1	1	1	1	0	0
89	GD1a(NeuGc) 42:2;O2	110	264.2	GD1a(NeuGc) 18:1;O2/24:1	1	1	1	1	0	0
90	GD1b 34:1;O2	111	264.2	GD1b 18:1;O2/16:0	1	1	1	1	0	0
91	G6 ganglioside 34:1;O2	112	264.2	G6 ganglioside 18:1;O2/16:0	1	1	1	1	0	0
92	G6 ganglioside 34:2;O2	113	264.2	G6 ganglioside 18:1;O2/16:1	1	1	1	1	0	0
93	G6 ganglioside 42:2;O2	114	264.2	G6 ganglioside 18:1;O2/24:1	1	1	1	1	0	0
94	GT1b 34:1;O2	115	264.2	GT1b 18:1;O2/16:0	1	1	1	1	0	0
95	GT1b 42:2;O2	116	264.2	GT1b 18:1;O2/24:1	1	1	1	1	0	0
96	Hex(5)-HexNAc(3)-NeuAc-Cer 34:1;O2	117	264.2	Hex(5)-HexNAc(3)-NeuAc-Cer 18:1;O2/16:0	1	1	1	1	0	0
97	Hex(5)-HexNAc(3)-NeuAc-Cer 42:2;O2	118	264.2	Hex(5)-HexNAc(3)-NeuAc-Cer 18:1;O2/24:1	1	1	1	1	0	0
98	Hex(5)-HexNAc(3)-Fuc-NeuAc-Cer34:1;O2	119	264.2	Hex(5)-HexNAc(3)-Fuc-NeuAc-Cer 18:1;O2/16:0	1	1	1	1	0	0
99	Hex(5)-HexNAc(3)-Fuc-NeuAc-Cer42:2;O2	120	264.2	Hex(5)-HexNAc(3)-Fuc-NeuAc-Cer 18:1;O2/24:1	1	1	1	1	0	0
100	Hex(5)-HexNAc(3)-NeuAc(2)-Cer 34:1;O2	121	264.2	Hex(5)-HexNAc(3)-NeuAc(2)-Cer 18:1;O2/16:0	1	1	1	1	0	0
101	Hex(5)-HexNAc(3)-NeuAc(2)-Cer 42:2;O2	122	264.2	Hex(5)-HexNAc(3)-NeuAc(2)-Cer 18:1;O2/24:1	1	1	1	1	0	0

## Sheet: MCF-10A C=C location level
Table S6. List of 30 gangliosides at the C=C location level identified in MCF-10A cells.
Number of Species	Species	[M+H]+or[M+2H]2+	[PBM+H]+ or[PBM+2H]2+	Chain Composition Level	Number of C=C location Level	C=C location Level	PB diagnostic ions-n-yFYO
1	GM3 40:2;O2	1235.75	1356.75	GM3 18:1;O2/22:1	1	GM3 18:1;O2/22:1(n-9)	599.5
2	GM3 42:2;O2	1263.78	1384.78	GM3 18:1;O2/24:1	2	GM3 18:1;O2/24:1(n-9)	627.5
3	GM3 42:3;O2	1261.77	1382.77	GM3 18:1;O2/24:2	3	GM3 18:1;O2/24:2(n-6,9)	625.5, 667.6
				GM3 18:2;O2/24:1	4	GM3 18:2(n-4);O2/24:1(n-9)	627.5, 695.6
4	GM3 42:1;O3	1281.81	1402.81	GM3 18:0;O3/24:1	5	GM3 18:0;O3/24:1(n-9)	645.5
5	GM2 40:2;O2	1438.83	1559.83	GM2 18:1;O2/22:1	6	GM2 18:1;O2/22:1(n-9)	599.5
6	GM2 42:2;O2	1466.86	1587.86	GM2 18:1;O2/24:1	7	GM2 18:1;O2/24:1(n-9)	627.5
7	GM2 42:3;O2	1464.84	1585.84	GM2 18:1;O2/24:2	8	GM2 18:1;O2/24:2(n-6,9)	625.5, 667.6
				GM2 18:2;O2/24:1	9	GM2 18:2(n-4);O2/24:1(n-9)	627.5, 695.6
8	GM2 42:1;O3	1484.8	1605.8	GM2 18:0;O3/24:1	10	GM2 18:0;O3/24:1(n-9)	645.5
9	GD3 42:2;O2	777.952	838.452	GD3 18:1;O2/24:1	11	GD3 18:1;O2/24:1(n-9)	627.5
10	GD3 42:3;O2	776.949	837.449	GD3 18:1;O2/24:2	12	GD3 18:1;O2/24:2(n-6,9)	625.5, 667.6
				GD3 18:2;O2/24:1	13	GD318:2(n-4);O2/24:1(n-9)	627.5, 695.6
11	GM1b 42:2;O2	814.883	875.383	GM1b 18:1;O2/24:1	14	GM1b 18:1;O2/24:1(n-9)	627.5
12	GM1b 42:3;O2	813.883	874.383	GM1b 18:1;O2/24:2	15	GM1b 18:1;O2/24:2(n-6,9)	625.5, 667.6
				GM1b 18:2;O2/24:1	16	GM1b 18:2;O2/24:1(n-9)	627.5, 695.6
13	GD2 42:2;O2	879.45	939.95	GD2 18:1;O2/24:1	17	GD2 18:1;O2/24:1(n-9)	627.5
14	GD2 42:3;O2	878.45	938.95	GD2 18:1;O2/24:2	18	GD2 18:1;O2/24:2(n-6,9)	625.5, 667.6
15	GD1a 42:2;O2	960.52	1021.02	GD1a 18:1;O2/24:1	19	GD1a 18:1;O2/24:1(n-9)	627.5
16	GD1a 42:3;O2	959.502	1020	GD1a 18:1;O2/24:2	20	GD1a 18:1;O2/24:2(n-6,9)	625.5, 667.6
17	GD1a 42:1;O3	969.51	1030.01	GD1a 18:0;O3/24:1	21	GD1a 18:0;O3/24:1(n-9)	645.5
18	GD1a 42:2;O3	968.506	1029.01	GD1a 18:1;O2/24:2	22	GD1a 18:1;O2/24:2(n-6,9)	625.5, 667.6
19	GT1b 42:2;O2	1105.96	1166.46	GT1b 18:1;O2/24:1	23	GT1b 18:1;O2/24:1(n-9)	627.5
20	Hex(5)-HexNAc(3)-NeuAc-Cer 42:2;O2	1180	1240.5	Hex(5)-HexNAc(3)-NeuAc-Cer 18:1;O2/24:1	24	Hex(5)-HexNAc(3)-NeuAc-Cer 18:1;O2/24:1(n-9)	627.5
21	Hex(5)-HexNAc(3)-NeuAc-Cer 42:3;O2	1179	1239.5	Hex(5)-HexNAc(3)-NeuAc-Cer 18:1;O2/24:2	25	Hex(5)-HexNAc(3)-NeuAc-Cer 18:1;O2/24:2(n-6,9)	625.5, 667.6
22	Hex(5)-HexNAc(3)-Fuc-NeuAc-Cer 42:2;O2	1253.08	1313.58	Hex(5)-HexNAc(3)-Fuc-NeuAc-Cer 18:1;O2/24:1	26	Hex(5)-HexNAc(3)-Fuc-NeuAc-Cer 18:1;O2/24:1(n-9)	627.5
23	Hex(5)-HexNAc(3)-Fuc-NeuAc-Cer 42:3;O2	1252.08	1312.58	Hex(5)-HexNAc(3)-Fuc-NeuAc-Cer 18:1;O2/24:2	27	Hex(5)-HexNAc(3)-Fuc-NeuAc-Cer 18:1;O2/24:2(n-6,9)	625.5, 667.6
24	Hex(5)-HexNAc(3)-NeuAc(2)-Cer 42:2;O2	1325.54	1386.04	Hex(5)-HexNAc(3)-NeuAc(2)-Cer 18:1;O2/24:1	28	Hex(5)-HexNAc(3)-NeuAc(2)-Cer 18:1;O2/24:1(n-9)	627.5
25	Hex(5)-HexNAc(3)-NeuAc(2)-Cer 42:3;O2	1324.54	1385.04	Hex(5)-HexNAc(3)-NeuAc(2)-Cer 18:1;O2/24:2	29	Hex(5)-HexNAc(3)-NeuAc(2)-Cer 18:1;O2/24:2(n-6,9)	625.5, 667.6
26	Hex(5)-HexNAc(3)-NeuAc(2)-Cer 42:1;O3	1334.54	1395.04	Hex(5)-HexNAc(3)-NeuAc(2)-Cer 18:0;O3/24:1	30	Hex(5)-HexNAc(3)-NeuAc(2)-Cer 18:0;O3/24:1(n-9)	645.5

## Sheet: Primer
Table S7. Gene-specific primers for enzymes
Target Name	Primer Name	Primer Sequence (5‘-3’)
ST3GAL5	ST3GAL5-human-F	TCCCTGCAATGGTACACCC
	ST3GAL5-human-R	ACTTGGGACGACATTCCTTCT
ST8SIA1	ST8SIA1-human-F	GGAAGAGCATGTGGTATGACGG
	ST8SIA1-human-R	CAGAATCCCACCATTTCCCACC
ST3GAL2	ST3GAL2-human-F	TCCGACTGGTTTGACAGCCACT
	ST3GAL2-human-R	CTTCTCCAGCACCTCATTGGTG
ST8SIA5	ST8SIA5-human-F	ACCGGGATTTGTTGGGGAG
	ST8SIA5-human-R	CATACAGGATCTGTTGCAGCA
DEGS1	DEGS1-human-F	CCAACATTCCTGGAAAAAGTCTTC
	DEGS1-human-R	GCCTCTTCATTCTTGAGTAGGGA
DEGS2	DEGS2-human-F	CGGCGCAAGGAGATACTGG
	DEGS2-human-R	GTTGTGCGAGATGTCGTGGA
CerS5	CerS5-human-F	GGTCACCATTGGGCTTATCTCC
	CerS5-human-R	GTGTCACAGAGCCGCTGATACT
CerS6	CerS6-human-F	GACGCAATCAGGAGAAGCCAAG
	CerS6-human-R	GGTAGTTGTACCAGCAATGCCTC
SCD1	SCD1-human-F	CCTGGTTTCACTTGGAGCTGTG
	SCD1-human-R	TGTGGTGAAGTTGATGTGCCAGC
CMAH	CMAHP-human-F	TCAGTCCCTGTTTGTGAGTCT
	CMAHP-human-R	AAGGTGGCCCCAATGTTTCC

## Sheet: Enzymes
Table S8. List of 39 enzymes involved in ganglioside biosynthesis
Number	Gene	Full Name of Gene	UniProt ID (human)	Protein	Detected in MCF-7 cells
1	UGCG	UDP-glucose ceramide glucosyltransferase	Q16739	Ceramide glucosyltransferase	√
2	B4GALT5	Beta-1,4-galactosyltransferase 5	O43286	Beta-1,4-galactosyltransferase 5	√
3	B4GALT6	Beta-1,4-galactosyltransferase 6	Q9UBX8	Beta-1,4-galactosyltransferase 6	×
4	B4GALNT1	Beta-1,4-N-acetyl-galactosaminyltransferase 1	Q00973	Beta-1,4 N-acetylgalactosaminyltransferase 1	√
5	B3GALT4	Beta-1,3-galactosyltransferase 4	O96024	Beta-1,3-galactosyltransferase 4	×
6	B3GNT5	Beta-1,3-N-acetylglucosaminyltransferase 5	Q9BYG0	Lactosylceramide 1,3-N-acetyl-beta-D-glucosaminyltransferase	√
7	A4GALT	Alpha-1,4-galactosyltransferase	Q9NPC4	Lactosylceramide 4-alpha-galactosyltransferase	√
8	B4GALT1	Beta-1,4-galactosyltransferase 1	P15291	Beta-1,4-galactosyltransferase 1	√
9	B3GALT5	Beta-1,3-galactosyltransferase 5	Q9Y2C3	Beta-1,3-galactosyltransferase 5	×
10	B3GALNT1	Beta-1,3-N-acetylgalactosaminyltransferase 1	O75752	UDP-GalNAc:beta-1,3-N-acetylgalactosaminyltransferase 1	×
11	ST3GAL2	ST3 beta-galactoside alpha-2,3-sialyltransferase 2	Q16842	CMP-N-acetylneuraminate-beta-galactosamide-alpha-2,3-sialyltransferase 2	√
12	ST3GAL3	ST3 beta-galactoside alpha-2,3-sialyltransferase 3	Q11203	CMP-N-acetylneuraminate-beta-1,4-galactoside alpha-2,3-sialyltransferase	×
13	ST3GAL5	ST3 beta-galactoside alpha-2,3-sialyltransferase 5	Q9UNP4	Lactosylceramide alpha-2,3-sialyltransferase	×
14	ST8SIA1	ST8 alpha-N-acetyl-neuraminide alpha-2,8-sialyltransferase 1	Q92185	Alpha-N-acetylneuraminide alpha-2,8-sialyltransferase	×
15	ST8SIA3	ST8 alpha-N-acetyl-neuraminide alpha-2,8-sialyltransferase 3	O43173	Alpha-N-acetylneuraminate alpha-2,8-sialyltransferase ST8SIA3	×
16	ST8SIA5	ST8 alpha-N-acetyl-neuraminide alpha-2,8-sialyltransferase 5	O15466	Alpha-2,8-sialyltransferase 8E	×
17	FUT1	Fucosyltransferase 1	P19526	Galactoside alpha-(1,2)-fucosyltransferase 1	√
18	FUT2	Fucosyltransferase 2	Q10981	Galactoside alpha-(1,2)-fucosyltransferase 2	×
19	CMAHP	Cytidine monophospho-N-acetylneuraminic acid hydroxylase, pseudogene	Q9Y471	Inactive cytidine monophosphate-N-acetylneuraminic acid hydroxylase	×
20	CASD1	CAS1 domain-containing protein 1	Q96PB1	N-acetylneuraminate (7)9-O-acetyltransferase	√
21	FA2H	Fatty acid 2-hydroxylase	Q7L5A8	Fatty acid 2-hydroxylase	√
22	FADS3	Fatty acid desaturase 3	Q9Y5Q0	Fatty acid desaturase 3	×
23	CerS1	Ceramide synthase 1	P27544	Ceramide synthase 1	√
24	CerS2	Ceramide synthase 2	Q96G23	Ceramide synthase 2	√
25	CerS3	Ceramide synthase 3	Q8IU89	Ceramide synthase 3	×
26	CerS4	Ceramide synthase 4	Q9HA82	Ceramide synthase 4	√
27	CerS5	Ceramide synthase 5	Q8N5B7	Ceramide synthase 5	√
28	CerS6	Ceramide synthase 6	Q6ZMG9	Ceramide synthase 6	√
29	SPTLC1	Serine palmitoyltransferase long chain base subunit 1	O15269	Serine palmitoyltransferase 1	×
30	SPTLC2	Serine palmitoyltransferase long chain base subunit 2	O15270	Serine palmitoyltransferase 2	√
31	SPTLC3	Serine palmitoyltransferase long chain base subunit 3	Q9NUV7	Serine palmitoyltransferase 3	√
32	SPTssa	Serine palmitoyltransferase small subunit A	Q969W0	Serine palmitoyltransferase small subunit A	×
33	SPTssb	Serine palmitoyltransferase small subunit B	Q8NFR3	Serine palmitoyltransferase small subunit B	×
34	KDSR	3-ketodihydrosphingosine reductase	Q06136	3-ketodihydrosphingosine reductase	√
35	DEGS1	Delta(4)-desaturase, sphingolipid 1	O15121	Sphingolipid delta(4)-desaturase DES1	√
36	DEGS2	Delta(4)-desaturase, sphingolipid 2	Q6QHC5	Sphingolipid delta(4)-desaturase/C4-monooxygenase DES2	×
37	SCD1	Stearoyl-CoA desaturase 1	O00767	Stearoyl-CoA desaturase	√
38	ELOVL5	ELOVL fatty acid elongase 5	Q9NYP7	Very long chain fatty acid elongase 5	√
39	ELOVL6	ELOVL fatty acid elongase 6	Q9H5J4	Very long chain fatty acid elongase 6	√
